# Supplementary material for: Unprecedented Ir(iii) cationic complexes based on tridentate tetrazolate ligands: synthesis, photophysics and encapsulation in SiO2 nanoparticles
Source: Royal Society of Chemistry journal article supplement (doi:10.1039/d2nj06037j), 2023-01-01
Supplement: d2nj06037j1.pdf [file d2nj06037j1.pdf]

## Electronic Supporting Information

### **Unprecedented Ir(III) cationic complexes based on tridentate tetrazolate ligands: synthesis, photophysics and encapsulation in SiO<sub>2</sub> nanoparticles**

José Troya,<sup>‡,†</sup> María Mar Quesada-Moreno,<sup>\*,‡</sup> Juan Ramón Jiménez,<sup>‡</sup> and Juan Manuel Herrera.<sup>\*,‡</sup>

<sup>‡</sup>*Departamento de Química Inorgánica, Facultad de Ciencias, Unidad de Excelencia en Química Aplicada a Biomedicina y Medioambiente (UEQ), Universidad de Granada, Avda. Fuentenueva s/n, 18071, Granada, Spain. Email: [mqmoreno@ugr.es](mailto:mqmoreno@ugr.es), [jmherrera@ugr.es](mailto:jmherrera@ugr.es)*

<sup>†</sup>*Present address: Instituto de Ciencia Molecular (ICMol), Universidad de Valencia, Catedrático José Beltrán 2, 46980, Paterna, Spain.*

# $^1\text{H}$ NMR of ligand Hphenttz

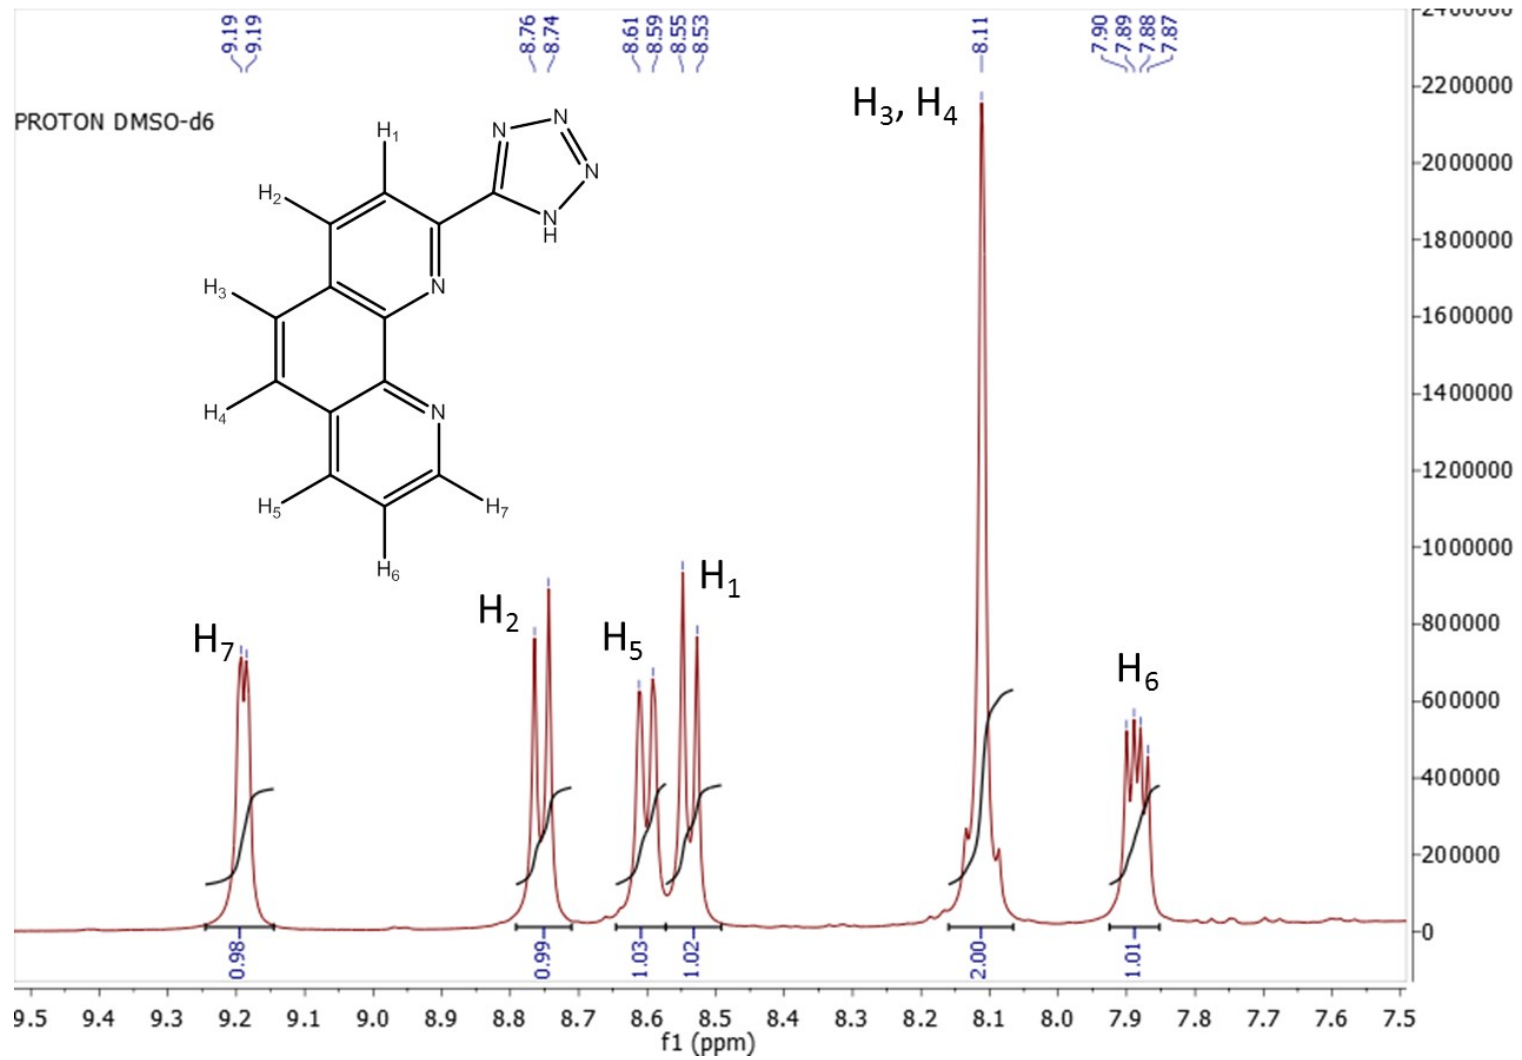

# <sup>1</sup>H NMR of complex 1

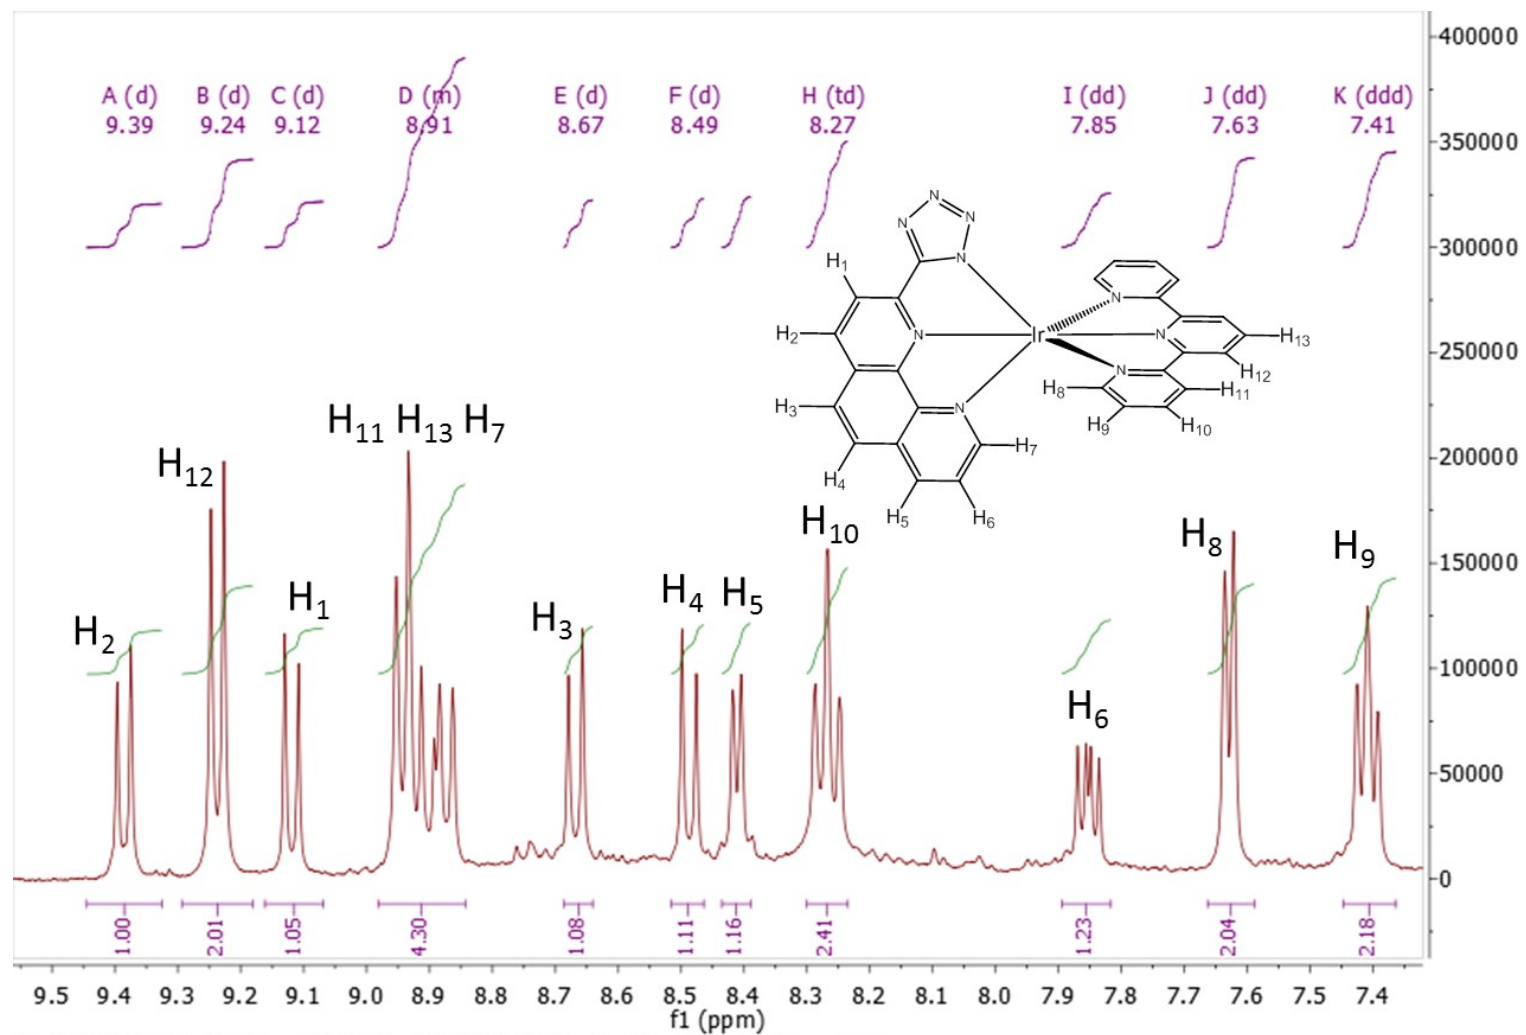

19-06462-JMH60.10.fid — PROTON\_Ali DMSO {C:\Bruker\TopSpin4.0.6} root 23

# $^{13}\text{C}$ NMR of complex **1**

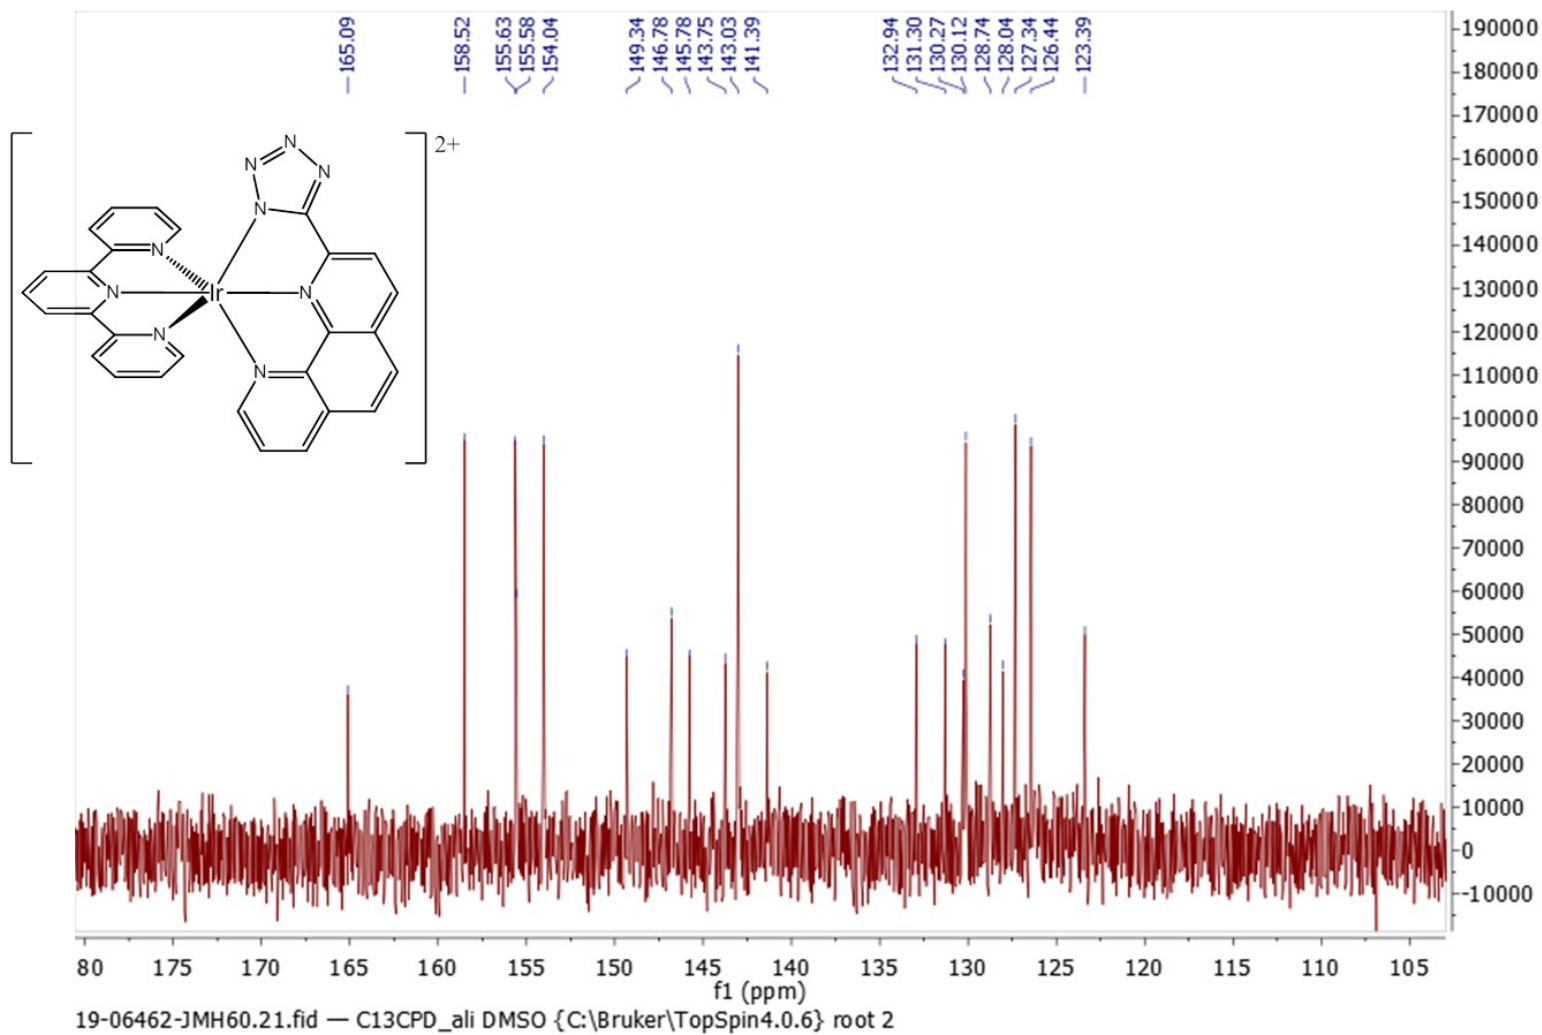

### 2D HH-COSY of complex 1

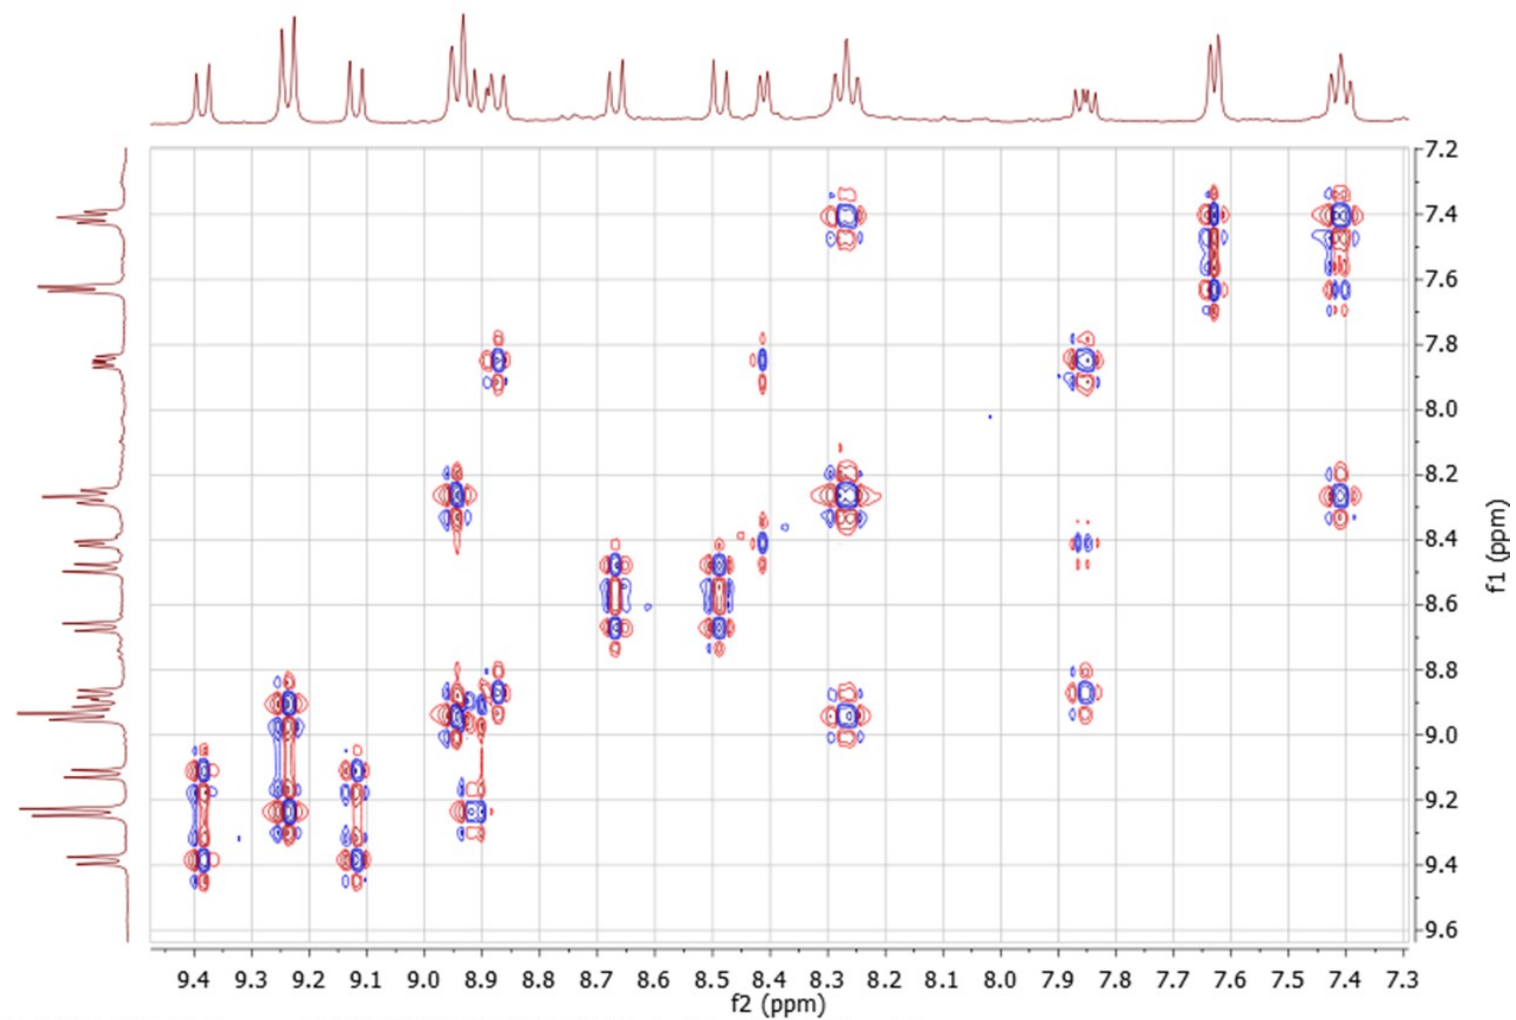

# $^1\text{H}$ NMR of complex 2

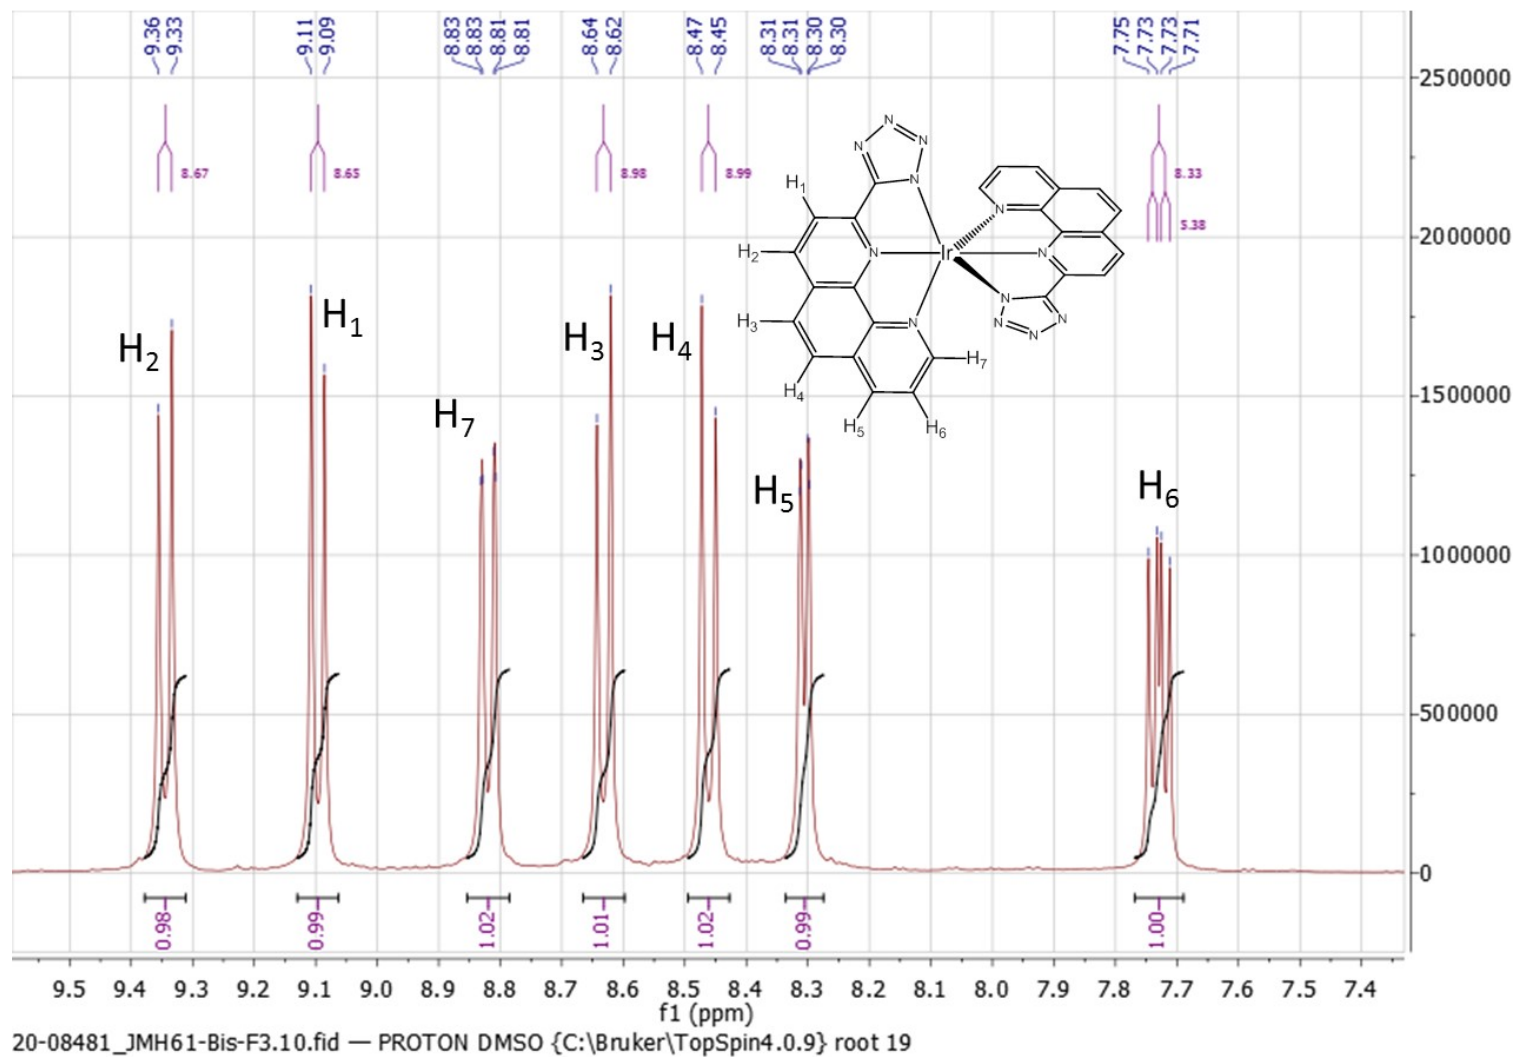

# <sup>13</sup>C NMR of complex 2

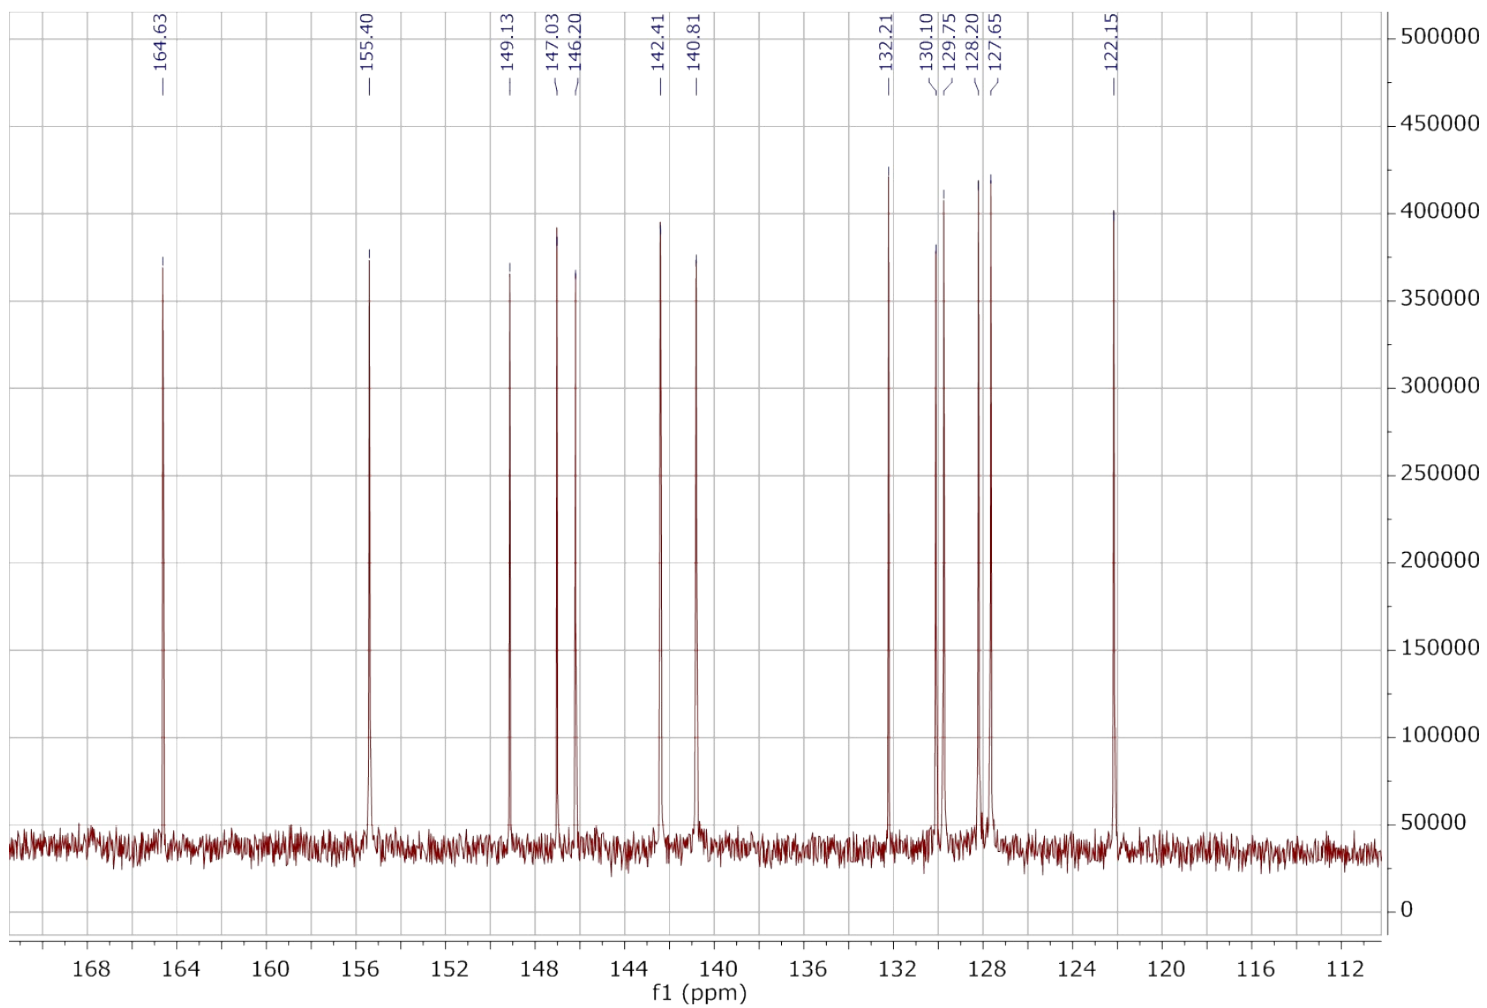

20-02378\_JMH-61Bis.12.fid — C13CPD\_ali DMSO {C:\Bruker\TopSpin4.0.7} root 11

# $^{13}\text{C}$ DEPT of complex 2

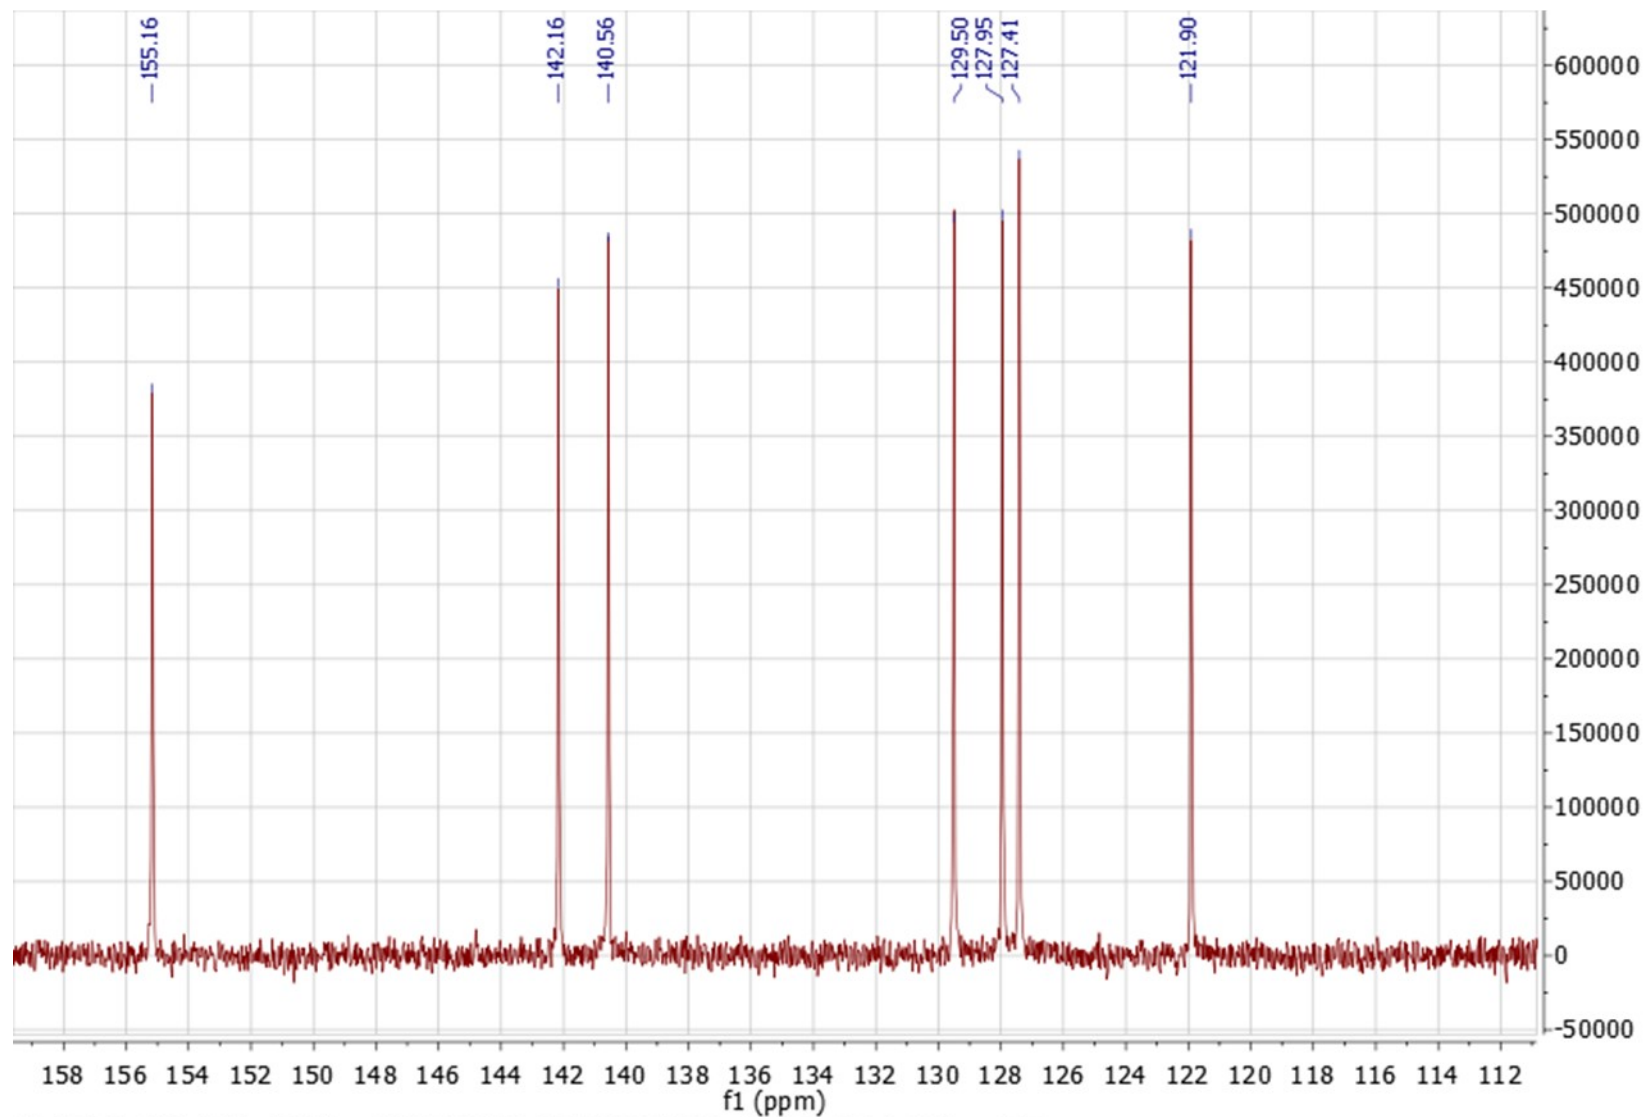

20-02378\_JMH-61Bis.13.fid — C13DEPT135\_Ali DMSO {C:\Bruker\TopSpin4.0.7} root 11



**Table S1. Crystallographic data for complexes 1-2.**

|                                            | <b>1</b>                                                                         | <b>2</b>                                                           |
|--------------------------------------------|----------------------------------------------------------------------------------|--------------------------------------------------------------------|
| Formula                                    | C <sub>30</sub> H <sub>21</sub> F <sub>12</sub> IrN <sub>10</sub> P <sub>2</sub> | C <sub>34</sub> H <sub>26</sub> F <sub>6</sub> IrN <sub>16</sub> P |
| Mw (g·mol <sup>-1</sup> )                  | 1003.71                                                                          | 995.88                                                             |
| T (K)                                      | 100                                                                              | 100.0                                                              |
| Crystal system                             | monoclinic                                                                       | monoclinic                                                         |
| Space group                                | P2 <sub>1</sub> /c                                                               | C2/c                                                               |
| a/Å                                        | 13.6360(5)                                                                       | 18.841(3)                                                          |
| b/Å                                        | 11.6774(4)                                                                       | 12.3097(19)                                                        |
| c/Å                                        | 20.3107(7)                                                                       | 18.522(4)                                                          |
| α/°                                        | 90                                                                               | 90                                                                 |
| β/°                                        | 91.2258(12)                                                                      | 120.168(3)                                                         |
| γ/°                                        | 90                                                                               | 90                                                                 |
| Z                                          | 4                                                                                | 4                                                                  |
| ρ <sub>calc</sub> (g·cm <sup>-3</sup> )    | 2.062                                                                            | 1.781                                                              |
| M (mm <sup>-1</sup> )                      | 4.341                                                                            | 3.720                                                              |
| F(000)                                     | 1944.0                                                                           | 1952.0                                                             |
| Crystal size/mm <sup>3</sup>               | 0.339 × 0.31 × 0.239                                                             | 0.304 × 0.183 × 0.145                                              |
| Radiation                                  | MoKα (λ = 0.71073)                                                               | MoKα (λ = 0.71073)                                                 |
| 2θ range for data collection/°             | 4.592 to 61.304                                                                  | 5.002 to 56.844                                                    |
| Reflections collected                      | 74808                                                                            | 55479                                                              |
| Independent reflections                    | 9938 [R <sub>int</sub> = 0.0534, R <sub>sigma</sub> = 0.0270]                    | 4647 [R <sub>int</sub> = 0.0510, R <sub>sigma</sub> = 0.0221]      |
| Data/restraints/parameters                 | 9938/52/534                                                                      | 4647/0/266                                                         |
| Goodness-of-fit on F <sup>2</sup>          | 1.175                                                                            | 1.119                                                              |
| Final R indexes [I >= 2σ (I)]              | R <sub>1</sub> = 0.0241, wR <sub>2</sub> = 0.0513                                | R <sub>1</sub> = 0.0151, wR <sub>2</sub> = 0.0386                  |
| Final R indexes [all data]                 | R <sub>1</sub> = 0.0320, wR <sub>2</sub> = 0.0542                                | R <sub>1</sub> = 0.0164, wR <sub>2</sub> = 0.0390                  |
| Largest diff. peak/hole /e Å <sup>-3</sup> | 1.38/-1.16                                                                       | 0.61/-1.00                                                         |

**Table S2.** Selected bond distances (Å) and angles (°) for complex **1**. The theoretical values have been calculated at the CAM-B3LYP/6-31G\*\*+LANL2DZ and B3LYP/6-31G\*\*+LANL2DZ levels in the presence of the solvent (acetonitrile) in the singlet ground state ( $S_0$ ) and in the lowest-energy ( $T_1$ ) triplet state.

| <b>Bond distances (Å)</b> |                  |                                              |                                              |                                          |                                          |
|---------------------------|------------------|----------------------------------------------|----------------------------------------------|------------------------------------------|------------------------------------------|
|                           | <b>Exp. (RX)</b> | <b>Theor. <math>S_0</math><br/>CAM-B3LYP</b> | <b>Theor. <math>T_1</math><br/>CAM-B3LYP</b> | <b>Theor. <math>S_0</math><br/>B3LYP</b> | <b>Theor. <math>T_1</math><br/>B3LYP</b> |
| Ir1-N1                    | 2.045(2)         | 2.075                                        | 2.076                                        | 2.087                                    | 2.088                                    |
| Ir1-N2                    | 1.972(2)         | 1.993                                        | 1.992                                        | 2.000                                    | 2.004                                    |
| Ir1-N3                    | 2.060(2)         | 2.076                                        | 2.076                                        | 2.087                                    | 2.088                                    |
| Ir1-N4                    | 2.069(2)         | 2.111                                        | 2.111                                        | 2.128                                    | 2.130                                    |
| Ir1-N5                    | 2.0007(19)       | 2.012                                        | 2.011                                        | 2.022                                    | 2.005                                    |
| Ir1-N6                    | 2.047(2)         | 2.051                                        | 2.039                                        | 2.062                                    | 2.048                                    |

| <b>Bond angles (°)</b> |                  |                                              |                                              |                                          |                                          |
|------------------------|------------------|----------------------------------------------|----------------------------------------------|------------------------------------------|------------------------------------------|
|                        | <b>Exp. (RX)</b> | <b>Theor. <math>S_0</math><br/>CAM-B3LYP</b> | <b>Theor. <math>T_1</math><br/>CAM-B3LYP</b> | <b>Theor. <math>S_0</math><br/>B3LYP</b> | <b>Theor. <math>T_1</math><br/>B3LYP</b> |
| N1-Ir-N2               | 79.83(8)         | 79.83                                        | 79.81                                        | 79.68                                    | 79.60                                    |
| N1-Ir-N3               | 159.63(8)        | 159.65                                       | 159.60                                       | 159.35                                   | 159.18                                   |
| N1-Ir-N4               | 93.43(8)         | 92.16                                        | 92.50                                        | 92.19                                    | 92.61                                    |
| N1-Ir-N5               | 99.71(8)         | 100.17                                       | 100.18                                       | 100.32                                   | 100.39                                   |
| N1-Ir-N6               | 88.33(8)         | 91.83                                        | 91.41                                        | 91.92                                    | 91.50                                    |
| N2-Ir-N3               | 80.09(8)         | 79.83                                        | 79.81                                        | 79.68                                    | 79.60                                    |
| N2-Ir-N4               | 97.33(8)         | 101.71                                       | 102.54                                       | 101.94                                   | 102.44                                   |
| N2-Ir-N5               | 177.76(8)        | 178.54                                       | 178.53                                       | 178.57                                   | 178.76                                   |
| N2-Ir-N6               | 104.82(8)        | 101.01                                       | 99.70                                        | 101.12                                   | 100.50                                   |
| N3-Ir-N4               | 92.43(8)         | 92.16                                        | 92.50                                        | 92.18                                    | 92.61                                    |
| N3-Ir-N5               | 100.49(8)        | 100.17                                       | 100.18                                       | 100.32                                   | 100.39                                   |
| N3-Ir-N6               | 93.56(8)         | 91.83                                        | 91.41                                        | 91.92                                    | 91.50                                    |
| N4-Ir-N5               | 80.49(8)         | 79.75                                        | 78.93                                        | 79.49                                    | 78.80                                    |
| N4-Ir-N6               | 157.73(8)        | 157.28                                       | 157.76                                       | 156.93                                   | 157.06                                   |
| N5-Ir-N6               | 77.33(8)         | 77.52                                        | 78.83                                        | 77.44                                    | 78.26                                    |

**Table S3.** Selected bond distances (Å) and angles (°) for complex **2**. The theoretical values have been calculated at the CAM-B3LYP/6-31G\*\*+LANL2DZ and B3LYP/6-31G\*\*+LANL2DZ levels in the presence of the solvent (acetonitrile) in the singlet ground state ( $S_0$ ) and in the lowest-energy ( $T_1$ ) triplet state.

| <b>Bond distances (Å)</b> |                  |                                              |                                              |                                          |                                          |
|---------------------------|------------------|----------------------------------------------|----------------------------------------------|------------------------------------------|------------------------------------------|
|                           | <b>Exp. (RX)</b> | <b>Theor. <math>S_0</math><br/>CAM-B3LYP</b> | <b>Theor. <math>T_1</math><br/>CAM-B3LYP</b> | <b>Theor. <math>S_0</math><br/>B3LYP</b> | <b>Theor. <math>T_1</math><br/>B3LYP</b> |
| Ir1-N1                    | 2.0812(13)       | 2.112                                        | 2.113                                        | 2.125                                    | 2.128                                    |
| Ir1-N2                    | 1.9933(15)       | 2.008                                        | 2.008                                        | 2.017                                    | 2.020                                    |
| Ir1-N3                    | 2.0388(14)       | 2.049                                        | 2.049                                        | 2.060                                    | 2.060                                    |

| <b>Bond angles (°)</b> |                  |                                              |                                              |                                          |                                          |
|------------------------|------------------|----------------------------------------------|----------------------------------------------|------------------------------------------|------------------------------------------|
|                        | <b>Exp. (RX)</b> | <b>Theor. <math>S_0</math><br/>CAM-B3LYP</b> | <b>Theor. <math>T_1</math><br/>CAM-B3LYP</b> | <b>Theor. <math>S_0</math><br/>B3LYP</b> | <b>Theor. <math>T_1</math><br/>B3LYP</b> |
| N1-Ir-N1'              | 90.63(7)         | 93.23                                        | 93.72                                        | 93.01                                    | 93.52                                    |
| N1-Ir-N2               | 80.12(6)         | 79.80                                        | 79.77                                        | 79.55                                    | 79.48                                    |
| N1-Ir-N2'              | 101.83(5)        | 101.49                                       | 101.68                                       | 102.00                                   | 101.89                                   |
| N1-Ir-N3               | 157.87(5)        | 157.42                                       | 157.37                                       | 157.10                                   | 156.95                                   |
| N1-Ir-N3'              | 94.68(5)         | 91.72                                        | 91.20                                        | 91.95                                    | 91.47                                    |
| N1'-Ir-N2              | 101.83(5)        | 101.67                                       | 102.33                                       | 102.00                                   | 102.61                                   |
| N1'-Ir-N2'             | 80.12(6)         | 79.80                                        | 79.00                                        | 79.55                                    | 78.85                                    |
| N1'-Ir-N3              | 94.68(5)         | 91.73                                        | 91.80                                        | 91.95                                    | 92.26                                    |
| N1'-Ir-N3'             | 157.87(5)        | 157.42                                       | 157.93                                       | 157.10                                   | 157.36                                   |
| N2-Ir-N2'              | 177.28(8)        | 178.02                                       | 178.01                                       | 177.79                                   | 177.97                                   |
| N2-Ir-N3               | 77.77(6)         | 77.63                                        | 77.61                                        | 77.55                                    | 77.48                                    |
| N2-Ir-N3'              | 100.25(5)        | 100.89                                       | 99.72                                        | 100.89                                   | 100.02                                   |
| N3-Ir-N3'              | 88.44(8)         | 92.10                                        | 91.87                                        | 92.12                                    | 91.73                                    |

**Table S4.** Continuous Shape Measures<sup>1</sup> of the coordination sphere geometry for the Ir(III) centre in the complexes reported in this work.

| Compound                                  | JPPY-6            | TPR-6                         | OC-6         | PPY-6  | HP6    |
|-------------------------------------------|-------------------|-------------------------------|--------------|--------|--------|
| <b>1</b>                                  | 26.366            | 11.585                        | <b>2.394</b> | 22.307 | 33.383 |
| <b>2</b>                                  | 27.095            | 12.118                        | <b>2.570</b> | 23.088 | 33.967 |
| <b>[Ir(tpy)<sub>2</sub>]<sup>3+</sup></b> | 27.575            | 12.166                        | <b>2.032</b> | 23.636 | 34.185 |
| JPPY-6                                    | 5 C <sub>5v</sub> | Johnson pentagonal pyramid J2 |              |        |        |
| TPR-6                                     | 4 D <sub>3h</sub> | Trigonal prism                |              |        |        |
| OC-6                                      | 3 O <sub>h</sub>  | Octahedron                    |              |        |        |
| PPY-6                                     | 2 C <sub>5v</sub> | Pentagonal pyramid            |              |        |        |
| HP-6                                      | 1 D <sub>6h</sub> | Hexagon                       |              |        |        |

<sup>1</sup> a) S. Alvarez, P. Alemany, D. Casanova, J. Cirera, M. Lluell, D. Avnir, *Coord. Chem. Rev.* **2005**, *249*, 1693-1708, b) J. Cirera, E. Ruiz, S. Alvarez, *Organometallics*, **2005**, *24*, 1556-1562.

**Table S5.** List of the computed electronic transitions for complex **1** with their character obtained using CAM-B3LYP with the 6-31G\*\* + LANL2DZ basis sets. Only the transitions with character greater than 5% are reported.

| Excited state   | E (eV) | Wavelength (nm) | f      | Assignments      | Character (%) |
|-----------------|--------|-----------------|--------|------------------|---------------|
| T <sub>1</sub>  | 2.6319 | 471.09          | 0      | HOMO-2 ->LUMO+1  | 14.0          |
|                 |        |                 |        | HOMO-1 ->LUMO+1  | 7.7           |
|                 |        |                 |        | HOMO ->LUMO+1    | 15.2          |
|                 |        |                 |        | HOMO ->LUMO+2    | 12.6          |
|                 |        |                 |        | HOMO ->LUMO+3    | 26.7          |
| T <sub>2</sub>  | 2.8783 | 430.75          | 0      | HOMO-6 ->LUMO    | 6.8           |
|                 |        |                 |        | HOMO-3 ->LUMO    | 12.9          |
|                 |        |                 |        | HOMO-2 ->LUMO+2  | 7.8           |
|                 |        |                 |        | HOMO-1 ->LUMO+2  | 30.8          |
|                 |        |                 |        | HOMO-1 ->LUMO+3  | 14.8          |
| T <sub>3</sub>  | 3.1009 | 399.84          | 0      | HOMO ->LUMO+1    | 62.9          |
|                 |        |                 |        | HOMO ->LUMO+3    | 7.2           |
| T <sub>4</sub>  | 3.1408 | 394.75          | 0      | HOMO-2 ->LUMO    | 8.6           |
|                 |        |                 |        | HOMO-1 ->LUMO    | 52.8          |
|                 |        |                 |        | HOMO ->LUMO      | 5.4           |
| T <sub>5</sub>  | 3.5135 | 352.88          | 0      | HOMO-2 ->LUMO+1  | 40.9          |
|                 |        |                 |        | HOMO-2 ->LUMO+3  | 5.3           |
|                 |        |                 |        | HOMO-1 ->LUMO+1  | 9.4           |
|                 |        |                 |        | HOMO ->LUMO+2    | 5.5           |
|                 |        |                 |        | HOMO ->LUMO+3    | 11.0          |
| T <sub>6</sub>  | 3.7463 | 330.95          | 0      | HOMO-19 ->LUMO+7 | 7.5           |
|                 |        |                 |        | HOMO-4 ->LUMO+7  | 38.3          |
|                 |        |                 |        | HOMO-1 ->LUMO+7  | 12.7          |
|                 |        |                 |        | HOMO ->LUMO+7    | 27.0          |
| T <sub>7</sub>  | 3.7614 | 329.62          | 0      | HOMO-11 ->LUMO+5 | 6.0           |
|                 |        |                 |        | HOMO-8 ->LUMO    | 12.8          |
|                 |        |                 |        | HOMO-3 ->LUMO    | 35.2          |
| T <sub>8</sub>  | 3.8081 | 325.58          | 0      | HOMO-7 ->LUMO+1  | 5.2           |
|                 |        |                 |        | HOMO-2 ->LUMO+1  | 7.3           |
|                 |        |                 |        | HOMO-2 ->LUMO+2  | 13.1          |
|                 |        |                 |        | HOMO-2 ->LUMO+3  | 26.6          |
|                 |        |                 |        | HOMO-1 ->LUMO+3  | 6.3           |
| S <sub>1</sub>  | 3.8862 | 319.04          | 0.0542 | HOMO ->LUMO+1    | 86.2          |
| T <sub>9</sub>  | 3.8962 | 318.22          | 0      | HOMO-4 ->LUMO    | 24.1          |
|                 |        |                 |        | HOMO-2 ->LUMO    | 12.4          |
|                 |        |                 |        | HOMO-1 ->LUMO    | 6.4           |
|                 |        |                 |        | HOMO ->LUMO      | 5.6           |
| T <sub>10</sub> | 3.9667 | 312.57          | 0      | HOMO-5 ->LUMO+1  | 19.4          |
|                 |        |                 |        | HOMO ->LUMO+4    | 7.8           |
|                 |        |                 |        | HOMO ->LUMO+6    | 10.9          |

|                 |        |        |        |                                                                                                                                                |                                                         |
|-----------------|--------|--------|--------|------------------------------------------------------------------------------------------------------------------------------------------------|---------------------------------------------------------|
| S <sub>2</sub>  | 4.0508 | 306.08 | 0.0743 | HOMO-1 ->LUMO<br>HOMO ->LUMO                                                                                                                   | 55.7<br>26.0                                            |
| S <sub>3</sub>  | 4.1796 | 296.64 | 0.0099 | HOMO-19 ->LUMO+7<br>HOMO-4 ->LUMO+7<br>HOMO-1 ->LUMO+7<br>HOMO ->LUMO+7                                                                        | 6.1<br>36.5<br>13.0<br>29.5                             |
| S <sub>4</sub>  | 4.1817 | 296.49 | 0.0269 | HOMO-2 ->LUMO+1<br>HOMO-1 ->LUMO+1<br>HOMO ->LUMO+2<br>HOMO ->LUMO+3                                                                           | 33.7<br>13.3<br>15.5<br>27.7                            |
| S <sub>5</sub>  | 4.2865 | 289.24 | 0.2412 | HOMO-3 ->LUMO<br>HOMO-2 ->LUMO+1<br>HOMO-2 ->LUMO+2<br>HOMO-2 ->LUMO+3<br>HOMO-1 ->LUMO+1<br>HOMO-1 ->LUMO+3<br>HOMO ->LUMO+2<br>HOMO ->LUMO+3 | 5.4<br>14.8<br>6.4<br>6.5<br>13.2<br>6.6<br>9.8<br>20.6 |
| S <sub>6</sub>  | 4.2946 | 288.70 | 0.225  | HOMO-5 ->LUMO<br>HOMO-4 ->LUMO<br>HOMO-2 ->LUMO<br>HOMO-1 ->LUMO<br>HOMO ->LUMO                                                                | 5.9<br>14.2<br>9.4<br>19.0<br>44.0                      |
| S <sub>7</sub>  | 4.3458 | 285.30 | 0.0018 | HOMO-3 ->LUMO<br>HOMO-2 ->LUMO+3<br>HOMO-1 ->LUMO+2                                                                                            | 53.1<br>6.9<br>19.9                                     |
| S <sub>8</sub>  | 4.4108 | 281.09 | 0.0476 | HOMO-5 ->LUMO<br>HOMO-4 ->LUMO<br>HOMO-2 ->LUMO<br>HOMO-1 ->LUMO<br>HOMO ->LUMO                                                                | 20.9<br>18.7<br>41.0<br>7.1<br>5.0                      |
| S <sub>9</sub>  | 4.4507 | 278.57 | 0.2729 | HOMO-3 ->LUMO+7<br>HOMO-3 ->LUMO+9<br>HOMO-2 ->LUMO+1<br>HOMO-1 ->LUMO+3<br>HOMO ->LUMO+3                                                      | 32.8<br>7.1<br>6.0<br>8.5<br>12.5                       |
| S <sub>10</sub> | 4.4712 | 277.3  | 0.0257 | HOMO-5 ->LUMO+7<br>HOMO-5 ->LUMO+9<br>HOMO-2 ->LUMO+7<br>HOMO-1 ->LUMO+7<br>HOMO ->LUMO+7                                                      | 42.9<br>6.7<br>13.2<br>7.4<br>7.8                       |

**Table S6.** List of the computed electronic transitions for complex **1** with their character obtained using B3LYP with the 6-31G\*\* + LANL2DZ basis sets. Only the transitions with character greater than 5% are reported.

| Excited state  | E (eV) | Wavelength (nm) | f      | Assignments     | Character (%) |
|----------------|--------|-----------------|--------|-----------------|---------------|
| T <sub>1</sub> | 2.6365 | 470.27          | 0      | HOMO-2 ->LUMO+1 | 6.6           |
|                |        |                 |        | HOMO-1 ->LUMO+1 | 11.9          |
|                |        |                 |        | HOMO ->LUMO+1   | 28.9          |
|                |        |                 |        | HOMO ->LUMO+3   | 38.7          |
| T <sub>2</sub> | 2.8533 | 434.53          | 0      | HOMO ->LUMO+1   | 58.8          |
|                |        |                 |        | HOMO ->LUMO+3   | 27.7          |
| T <sub>3</sub> | 2.8737 | 431.44          | 0      | HOMO-3 ->LUMO   | 14.1          |
|                |        |                 |        | HOMO-2 ->LUMO+2 | 21.4          |
|                |        |                 |        | HOMO-1 ->LUMO+2 | 39.5          |
|                |        |                 |        | HOMO ->LUMO+2   | 5.1           |
| T <sub>4</sub> | 2.9680 | 417.74          | 0      | HOMO-2 ->LUMO   | 12.9          |
|                |        |                 |        | HOMO-1 ->LUMO   | 48.5          |
|                |        |                 |        | HOMO ->LUMO     | 25.4          |
| T <sub>5</sub> | 3.2205 | 384.98          | 0      | HOMO-2 ->LUMO+1 | 37.1          |
|                |        |                 |        | HOMO-1 ->LUMO+1 | 31.2          |
|                |        |                 |        | HOMO ->LUMO+3   | 15.4          |
| S <sub>1</sub> | 3.2627 | 380.01          | 0      | HOMO-1 ->LUMO   | 5.9           |
|                |        |                 |        | HOMO ->LUMO     | 91.4          |
| T <sub>6</sub> | 3.3088 | 374.71          | 0      | HOMO-4 ->LUMO   | 5.7           |
|                |        |                 |        | HOMO-2 ->LUMO   | 12.7          |
|                |        |                 |        | HOMO-1 ->LUMO   | 12.8          |
|                |        |                 |        | HOMO ->LUMO     | 63.1          |
| S <sub>2</sub> | 3.3350 | 371.77          | 0.0273 | HOMO ->LUMO+1   | 90.8          |
| T <sub>7</sub> | 3.4174 | 362.80          | 0      | HOMO-3 ->LUMO   | 61.6          |
|                |        |                 |        | HOMO-1 ->LUMO+2 | 9.4           |
|                |        |                 |        | HOMO ->LUMO+2   | 10.1          |
| T <sub>8</sub> | 3.5341 | 350.82          | 0      | HOMO-4 ->LUMO+3 | 9.3           |
|                |        |                 |        | HOMO-2 ->LUMO+3 | 39.2          |
|                |        |                 |        | HOMO-1 ->LUMO+3 | 28.9          |
| T <sub>9</sub> | 3.5796 | 346.36          | 0      | HOMO-4 ->LUMO+6 | 20.7          |
|                |        |                 |        | HOMO-1 ->LUMO+6 | 17.5          |
|                |        |                 |        | HOMO ->LUMO+6   | 39.8          |

|                 |        |        |        |                                                                        |                             |
|-----------------|--------|--------|--------|------------------------------------------------------------------------|-----------------------------|
| S <sub>3</sub>  | 3.5978 | 344.61 | 0.0278 | HOMO-1 ->LUMO<br>HOMO ->LUMO                                           | 87.0<br>6.1                 |
| T <sub>10</sub> | 3.6091 | 343.54 | 0      | HOMO-4 ->LUMO<br>HOMO-2 ->LUMO<br>HOMO-1 ->LUMO<br>HOMO ->LUMO+6       | 16.6<br>42.0<br>18.8<br>5.5 |
| S <sub>4</sub>  | 3.6823 | 336.70 | 0.007  | HOMO ->LUMO+2                                                          | 91.9                        |
| S <sub>5</sub>  | 3.6866 | 336.31 | 0.0666 | HOMO-2 ->LUMO+1<br>HOMO-1 ->LUMO+1<br>HOMO ->LUMO+3                    | 11.4<br>12.7<br>67.4        |
| S <sub>6</sub>  | 3.7120 | 334.00 | 0.0772 | HOMO-3 ->LUMO<br>HOMO-1 ->LUMO+1<br>HOMO-1 ->LUMO+3<br>HOMO ->LUMO+3   | 9.7<br>60.1<br>5.3<br>13.5  |
| S <sub>7</sub>  | 3.8046 | 325.88 | 0.1166 | HOMO-2 ->LUMO                                                          | 87.0                        |
| S <sub>8</sub>  | 3.8313 | 323.61 | 0.0014 | HOMO-3 ->LUMO+1                                                        | 87.7                        |
| S <sub>9</sub>  | 3.8959 | 318.24 | 0.0312 | HOMO-3 ->LUMO<br>HOMO-1 ->LUMO+2                                       | 68.8<br>8.3                 |
| S <sub>10</sub> | 3.9029 | 317.67 | 0.0009 | HOMO-4 ->LUMO+6<br>HOMO-3 ->LUMO+1<br>HOMO-1 ->LUMO+6<br>HOMO ->LUMO+6 | 16.2<br>9.1<br>15.2<br>49.8 |

---



**Table S7.** List of the computed electronic transitions for complex **2** with their character, obtained using CAM-B3LYP with the 6-31G\*\* + LANL2DZ basis sets. Only the transitions with character greater than 5% are reported.

| Excited state  | E (eV) | Wavelength (nm) | f | Assignments      | Character (%) |
|----------------|--------|-----------------|---|------------------|---------------|
| T <sub>1</sub> | 2.6192 | 473.37          | 0 | HOMO-3 ->LUMO+1  | 6.5           |
|                |        |                 |   | HOMO-2 ->LUMO    | 12.8          |
|                |        |                 |   | HOMO-1 ->LUMO+1  | 11.3          |
|                |        |                 |   | HOMO-1 ->LUMO+2  | 19.1          |
|                |        |                 |   | HOMO ->LUMO      | 5.2           |
|                |        |                 |   | HOMO ->LUMO+3    | 20.6          |
| T <sub>2</sub> | 2.6212 | 473.01          | 0 | HOMO-3 ->LUMO    | 6.6           |
|                |        |                 |   | HOMO-2 ->LUMO+1  | 12.6          |
|                |        |                 |   | HOMO-1 ->LUMO    | 11.4          |
|                |        |                 |   | HOMO-1 ->LUMO+3  | 19.0          |
|                |        |                 |   | HOMO ->LUMO+1    | 5.2           |
|                |        |                 |   | HOMO ->LUMO+2    | 20.9          |
| T <sub>3</sub> | 3.1153 | 397.98          | 0 | HOMO-1 ->LUMO    | 26.6          |
|                |        |                 |   | HOMO ->LUMO+1    | 35.9          |
|                |        |                 |   | HOMO ->LUMO+2    | 7.2           |
| T <sub>4</sub> | 3.1181 | 397.63          | 0 | HOMO-1 ->LUMO+1  | 26.6          |
|                |        |                 |   | HOMO ->LUMO      | 36.1          |
|                |        |                 |   | HOMO ->LUMO+3    | 7.3           |
| T <sub>5</sub> | 3.5212 | 352.1           | 0 | HOMO-3 ->LUMO    | 26.2          |
|                |        |                 |   | HOMO-2 ->LUMO+1  | 23.0          |
|                |        |                 |   | HOMO-2 ->LUMO+2  | 6.6           |
|                |        |                 |   | HOMO-1 ->LUMO+3  | 9.3           |
|                |        |                 |   | HOMO ->LUMO+1    | 5.5           |
|                |        |                 |   | HOMO ->LUMO+2    | 7.6           |
| T <sub>6</sub> | 3.5226 | 351.97          | 0 | HOMO-3 ->LUMO+1  | 25.5          |
|                |        |                 |   | HOMO-2 ->LUMO    | 22.7          |
|                |        |                 |   | HOMO-2 ->LUMO+3  | 7.1           |
|                |        |                 |   | HOMO-1 ->LUMO+2  | 9.6           |
|                |        |                 |   | HOMO ->LUMO      | 5.3           |
|                |        |                 |   | HOMO ->LUMO+3    | 7.5           |
| T <sub>7</sub> | 3.6538 | 339.33          | 0 | HOMO-21 ->LUMO+6 | 5.6           |
|                |        |                 |   | HOMO-6 ->LUMO+6  | 6.8           |
|                |        |                 |   | HOMO-4 ->LUMO+6  | 24.1          |
|                |        |                 |   | HOMO-2 ->LUMO+6  | 12.3          |
|                |        |                 |   | HOMO ->LUMO+6    | 42.5          |
| T <sub>8</sub> | 3.8124 | 325.22          | 0 | HOMO-4 ->LUMO+2  | 5.4           |
|                |        |                 |   | HOMO-3 ->LUMO+3  | 25.0          |
|                |        |                 |   | HOMO-2 ->LUMO+1  | 5.2           |
|                |        |                 |   | HOMO-2 ->LUMO+2  | 21.6          |

|                 |        |        |        |                 |      |
|-----------------|--------|--------|--------|-----------------|------|
|                 |        |        |        | HOMO ->LUMO+2   | 6.6  |
| T <sub>9</sub>  | 3.8147 | 325.02 | 0      | HOMO-4 ->LUMO+3 | 5.6  |
|                 |        |        |        | HOMO-3 ->LUMO+2 | 24.9 |
|                 |        |        |        | HOMO-2 ->LUMO   | 5.6  |
|                 |        |        |        | HOMO-2 ->LUMO+3 | 20.9 |
|                 |        |        |        | HOMO ->LUMO+3   | 6.4  |
| S <sub>1</sub>  | 3.8661 | 320.69 | 0.0458 | HOMO-1 ->LUMO+1 | 21.1 |
|                 |        |        |        | HOMO ->LUMO     | 63.8 |
| S <sub>2</sub>  | 3.879  | 319.63 | 0.047  | HOMO-1 ->LUMO   | 20.8 |
|                 |        |        |        | HOMO ->LUMO+1   | 64.0 |
| T <sub>10</sub> | 4.0634 | 305.12 | 0      | HOMO-6 ->LUMO+1 | 5.1  |
|                 |        |        |        | HOMO-5 ->LUMO   | 7.9  |
|                 |        |        |        | HOMO-5 ->LUMO+6 | 5.6  |
|                 |        |        |        | HOMO-1 ->LUMO+4 | 10.1 |
|                 |        |        |        | HOMO ->LUMO+5   | 7.5  |
| S <sub>3</sub>  | 4.0742 | 304.31 | 0.0023 | HOMO-6 ->LUMO+6 | 6.3  |
|                 |        |        |        | HOMO-4 ->LUMO+6 | 22.1 |
|                 |        |        |        | HOMO-2 ->LUMO+6 | 11.7 |
|                 |        |        |        | HOMO ->LUMO+6   | 45.2 |
| S <sub>4</sub>  | 4.0882 | 303.27 | 0.042  | HOMO-3 ->LUMO   | 15.5 |
|                 |        |        |        | HOMO-2 ->LUMO+1 | 22.0 |
|                 |        |        |        | HOMO-1 ->LUMO   | 7.5  |
|                 |        |        |        | HOMO-1 ->LUMO+3 | 13.9 |
|                 |        |        |        | HOMO ->LUMO+2   | 33.5 |
| S <sub>5</sub>  | 4.1212 | 300.84 | 0.0316 | HOMO-3 ->LUMO+1 | 17.5 |
|                 |        |        |        | HOMO-2 ->LUMO   | 25.2 |
|                 |        |        |        | HOMO-1 ->LUMO+1 | 7.2  |
|                 |        |        |        | HOMO-1 ->LUMO+2 | 13.4 |
|                 |        |        |        | HOMO ->LUMO+3   | 28.8 |
| S <sub>6</sub>  | 4.2238 | 293.54 | 0.2203 | HOMO-2 ->LUMO   | 15.3 |
|                 |        |        |        | HOMO-2 ->LUMO+3 | 9.6  |
|                 |        |        |        | HOMO-1 ->LUMO+1 | 9.4  |
|                 |        |        |        | HOMO-1 ->LUMO+2 | 21.0 |
|                 |        |        |        | HOMO ->LUMO     | 5.3  |
|                 |        |        |        | HOMO ->LUMO+3   | 15.9 |
| S <sub>7</sub>  | 4.2771 | 289.88 | 0.0922 | HOMO-3 ->LUMO+3 | 8.6  |
|                 |        |        |        | HOMO-2 ->LUMO+1 | 10.1 |
|                 |        |        |        | HOMO-2 ->LUMO+2 | 17.7 |
|                 |        |        |        | HOMO-1 ->LUMO   | 10.6 |
|                 |        |        |        | HOMO-1 ->LUMO+3 | 18.1 |
|                 |        |        |        | HOMO ->LUMO+1   | 6.3  |
|                 |        |        |        | HOMO ->LUMO+2   | 7.5  |

|                 |        |        |        |                 |      |
|-----------------|--------|--------|--------|-----------------|------|
| S <sub>8</sub>  | 4.285  | 289.35 | 0.3179 | HOMO-6 ->LUMO   | 8.2  |
|                 |        |        |        | HOMO-3 ->LUMO+1 | 8.1  |
|                 |        |        |        | HOMO-2 ->LUMO   | 16.9 |
|                 |        |        |        | HOMO-1 ->LUMO+1 | 14.5 |
|                 |        |        |        | HOMO ->LUMO     | 11.8 |
|                 |        |        |        | HOMO ->LUMO+3   | 18.8 |
| S <sub>9</sub>  | 4.4004 | 281.75 | 0.1531 | HOMO-6 ->LUMO+1 | 7.6  |
|                 |        |        |        | HOMO-5 ->LUMO   | 7.2  |
|                 |        |        |        | HOMO-2 ->LUMO+1 | 16.7 |
|                 |        |        |        | HOMO-1 ->LUMO   | 32.3 |
|                 |        |        |        | HOMO ->LUMO+1   | 12.8 |
| S <sub>10</sub> | 4.4231 | 280.31 | 0.1845 | HOMO-5 ->LUMO+1 | 8.6  |
|                 |        |        |        | HOMO-3 ->LUMO+1 | 6.7  |
|                 |        |        |        | HOMO-3 ->LUMO+2 | 6.3  |
|                 |        |        |        | HOMO-2 ->LUMO+3 | 16.5 |
|                 |        |        |        | HOMO-1 ->LUMO+1 | 22.8 |
|                 |        |        |        | HOMO ->LUMO+3   | 7.2  |

---

**Table S8.** List of the computed electronic transitions for complex **2** with their character, obtained using B3LYP with the 6-31G\*\* + LANL2DZ basis sets. Only the transitions with character greater than 5% are reported.

| Excited state  | E (eV) | Wavelength (nm) | f      | Assignments     | Character (%) |
|----------------|--------|-----------------|--------|-----------------|---------------|
| T <sub>1</sub> | 2.6272 | 471.93          | 0      | HOMO-2 ->LUMO   | 11.3          |
|                |        |                 |        | HOMO-1 ->LUMO+1 | 17.5          |
|                |        |                 |        | HOMO-1 ->LUMO+3 | 19.1          |
|                |        |                 |        | HOMO ->LUMO     | 10.7          |
|                |        |                 |        | HOMO ->LUMO+2   | 23.4          |
| T <sub>2</sub> | 2.6289 | 471.62          | 0      | HOMO-2 ->LUMO+1 | 11.1          |
|                |        |                 |        | HOMO-1 ->LUMO   | 18.1          |
|                |        |                 |        | HOMO-1 ->LUMO+2 | 19.2          |
|                |        |                 |        | HOMO ->LUMO+1   | 10.0          |
|                |        |                 |        | HOMO ->LUMO+3   | 23.6          |
| T <sub>3</sub> | 2.8476 | 435.40          | 0      | HOMO-1 ->LUMO   | 18.5          |
|                |        |                 |        | HOMO-1 ->LUMO+2 | 8.3           |
|                |        |                 |        | HOMO ->LUMO+1   | 44.8          |
|                |        |                 |        | HOMO ->LUMO+3   | 15.9          |
| T <sub>4</sub> | 2.8515 | 434.81          | 0      | HOMO-1 ->LUMO+1 | 18.4          |
|                |        |                 |        | HOMO-1 ->LUMO+3 | 7.9           |
|                |        |                 |        | HOMO ->LUMO     | 44.9          |
|                |        |                 |        | HOMO ->LUMO+2   | 16.2          |
| T <sub>5</sub> | 3.1951 | 388.05          | 0      | HOMO-3 ->LUMO+1 | 19.7          |
|                |        |                 |        | HOMO-2 ->LUMO   | 32.3          |
|                |        |                 |        | HOMO-1 ->LUMO+1 | 5.5           |
|                |        |                 |        | HOMO-1 ->LUMO+3 | 5.9           |
|                |        |                 |        | HOMO ->LUMO     | 15.3          |
|                |        |                 |        | HOMO ->LUMO+2   | 10.6          |
| T <sub>6</sub> | 3.1962 | 387.91          | 0      | HOMO-3 ->LUMO   | 21.0          |
|                |        |                 |        | HOMO-2 ->LUMO+1 | 31.9          |
|                |        |                 |        | HOMO-1 ->LUMO+2 | 6.2           |
|                |        |                 |        | HOMO ->LUMO+1   | 15.7          |
|                |        |                 |        | HOMO ->LUMO+3   | 10.2          |
| S <sub>1</sub> | 3.2442 | 382.17          | 0.0144 | HOMO ->LUMO     | 92.4          |
| S <sub>2</sub> | 3.2531 | 381.13          | 0.0122 | HOMO ->LUMO+1   | 92.2          |
| T <sub>7</sub> | 3.4488 | 359.50          | 0      | HOMO-6 ->LUMO+6 | 5.3           |
|                |        |                 |        | HOMO-4 ->LUMO+6 | 6.4           |

|                 |        |        |        |                 |      |
|-----------------|--------|--------|--------|-----------------|------|
|                 |        |        |        | HOMO-2 ->LUMO+6 | 7.7  |
|                 |        |        |        | HOMO-1 ->LUMO+1 | 10.6 |
|                 |        |        |        | HOMO ->LUMO+4   | 6.0  |
|                 |        |        |        | HOMO ->LUMO+6   | 41.0 |
| T <sub>8</sub>  | 3.4831 | 355.96 | 0      | HOMO-4 ->LUMO+1 | 5.2  |
|                 |        |        |        | HOMO-3 ->LUMO   | 6.3  |
|                 |        |        |        | HOMO-3 ->LUMO+2 | 5.0  |
|                 |        |        |        | HOMO-2 ->LUMO+3 | 8.7  |
|                 |        |        |        | HOMO-1 ->LUMO   | 37.9 |
|                 |        |        |        | HOMO ->LUMO+1   | 20.2 |
| T <sub>9</sub>  | 3.4965 | 354.60 | 0      | HOMO-3 ->LUMO+3 | 8.0  |
|                 |        |        |        | HOMO-2 ->LUMO+2 | 13.1 |
|                 |        |        |        | HOMO-1 ->LUMO+1 | 22.6 |
|                 |        |        |        | HOMO ->LUMO     | 13.3 |
|                 |        |        |        | HOMO ->LUMO+6   | 13.6 |
| T <sub>10</sub> | 3.5125 | 352.98 | 0      | HOMO-3 ->LUMO+2 | 16.0 |
|                 |        |        |        | HOMO-2 ->LUMO+3 | 23.1 |
|                 |        |        |        | HOMO-1 ->LUMO   | 7.6  |
|                 |        |        |        | HOMO-1 ->LUMO+2 | 6.4  |
|                 |        |        |        | HOMO ->LUMO+3   | 15.3 |
| S <sub>3</sub>  | 3.5182 | 352.41 | 0.0215 | HOMO-1 ->LUMO+1 | 80.9 |
|                 |        |        |        | HOMO ->LUMO+2   | 7.2  |
| S <sub>4</sub>  | 3.5800 | 346.33 | 0.0278 | HOMO-1 ->LUMO   | 75.3 |
|                 |        |        |        | HOMO ->LUMO+3   | 14.0 |
| S <sub>5</sub>  | 3.5878 | 345.57 | 0.0752 | HOMO-1 ->LUMO+1 | 7.0  |
|                 |        |        |        | HOMO ->LUMO+2   | 84.2 |
| S <sub>6</sub>  | 3.6030 | 344.12 | 0.0203 | HOMO-2 ->LUMO+1 | 12.8 |
|                 |        |        |        | HOMO-1 ->LUMO   | 11.3 |
|                 |        |        |        | HOMO ->LUMO+3   | 67.3 |
| S <sub>7</sub>  | 3.6316 | 341.40 | 0.0656 | HOMO-2 ->LUMO   | 84.3 |
| S <sub>8</sub>  | 3.7262 | 332.73 | 0.0107 | HOMO-3 ->LUMO   | 12.9 |
|                 |        |        |        | HOMO-2 ->LUMO+1 | 54.1 |
|                 |        |        |        | HOMO-2 ->LUMO+3 | 8.6  |
|                 |        |        |        | HOMO-1 ->LUMO+2 | 9.4  |
| S <sub>9</sub>  | 3.7674 | 329.09 | 0.0247 | HOMO-2 ->LUMO+1 | 12.6 |
|                 |        |        |        | HOMO-1 ->LUMO+2 | 73.0 |

|                 |        |        |        |                 |      |
|-----------------|--------|--------|--------|-----------------|------|
| S <sub>10</sub> | 3.8016 | 326.14 | 0.0274 | HOMO-3 ->LUMO+1 | 8.1  |
|                 |        |        |        | HOMO-1 ->LUMO+3 | 52.7 |
|                 |        |        |        | HOMO ->LUMO+6   | 18.1 |

**Table S9.** Calculated wavelengths and orbital transition analyses of the lowest energy emission band of complex **1** obtained using CAM-B3LYP and B3LYP with the 6-31G\*\* + LANL2DZ basis sets. Only the transitions with character greater than 5% are reported.

| Functional       | Excited state  | E (eV) | Wavelength (nm) | f | Assignments | Character (%) |
|------------------|----------------|--------|-----------------|---|-------------|---------------|
| <b>CAM-B3LYP</b> | T <sub>1</sub> | 1.2189 | 1017.20         | 0 | HOMO → LUMO | 79.3          |
| <b>B3LYP</b>     | T <sub>1</sub> | 1.8678 | 663.80          | 0 | HOMO → LUMO | 86.2          |

**Table S10.** Calculated wavelengths and orbital transition analyses of the lowest energy emission band of complex **2** obtained using CAM-B3LYP and B3LYP with the 6-31G\*\* + LANL2DZ basis sets. Only the transitions with character greater than 5% are reported.

| Functional       | Excited state  | E (eV) | Wavelength (nm) | f | Assignments   | Character (%) |
|------------------|----------------|--------|-----------------|---|---------------|---------------|
| <b>CAM-B3LYP</b> | T <sub>1</sub> | 2.5508 | 486.06          | 0 | HOMO → LUMO   | 79.4          |
| <b>B3LYP</b>     | T <sub>1</sub> | 2.5700 | 482.09          | 0 | HOMO → LUMO   | 81.2          |
|                  |                |        |                 |   | HOMO-1 → LUMO | 6.4           |

**Figure S1.-** Unit cell content of compounds **1** and **2** highlighting intermolecular  $\pi$ - $\pi$  interactions between neighbour complexes (crystallization solvent molecules and counter-ions have been omitted).

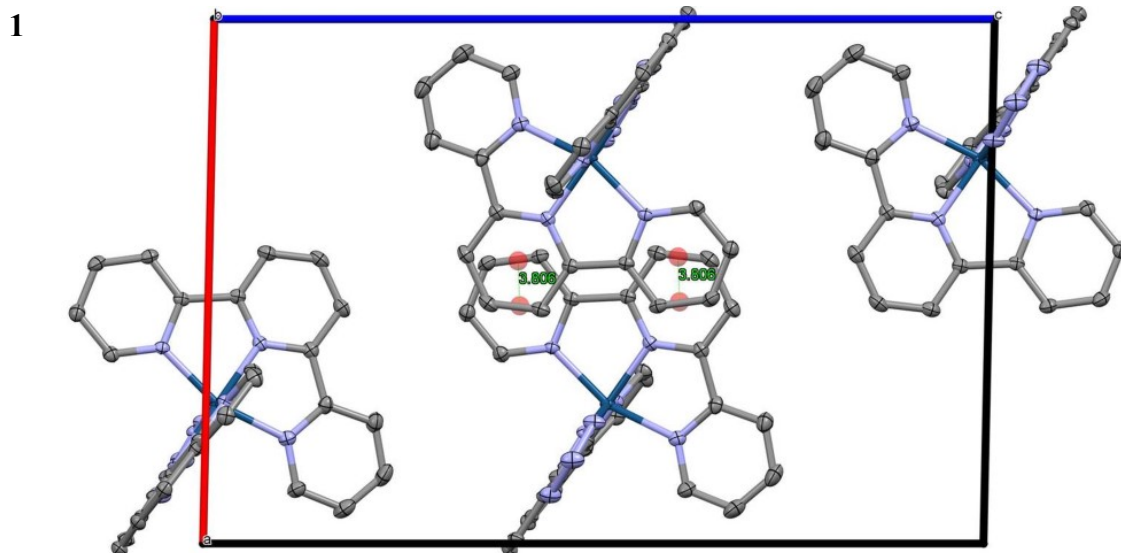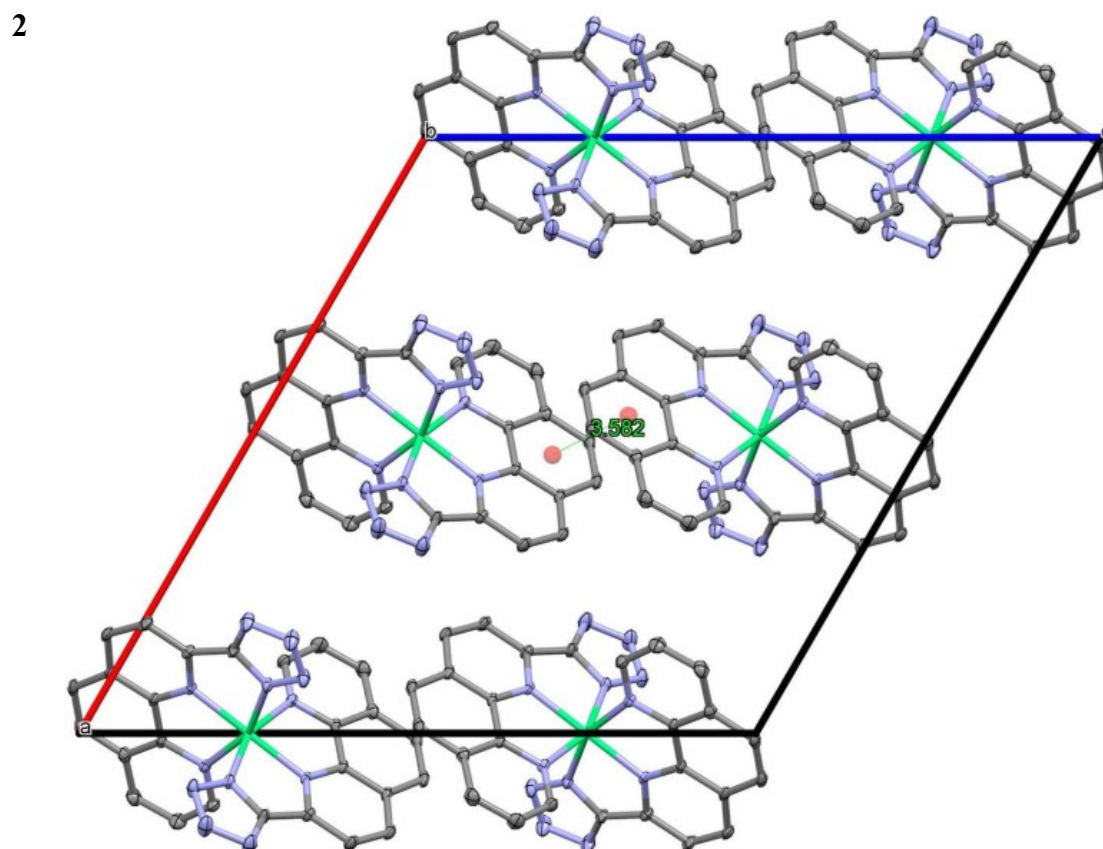

**Figure S2.-** Experimental (black dots) and fitting decay (red line) of the excited **1** at 293K in aerated acetonitrile solution. Excitation at 375 nm. Emission at 532 nm.

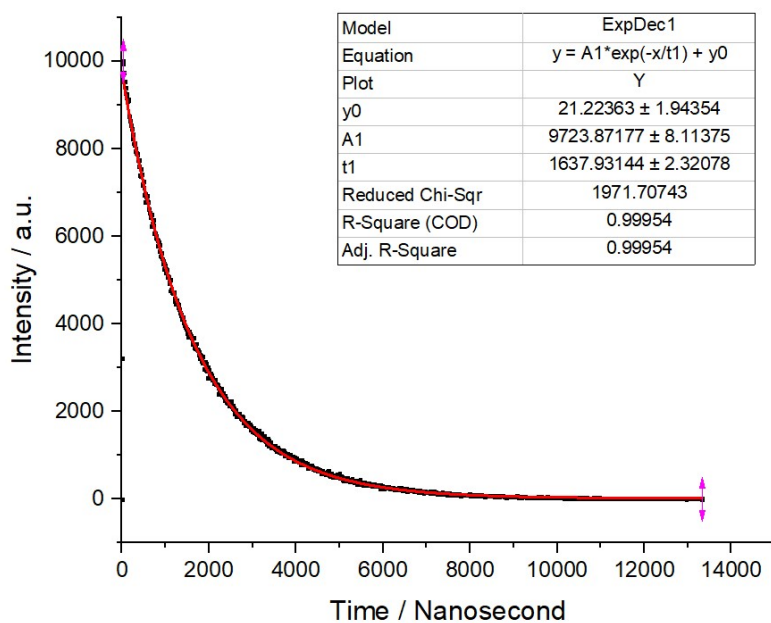

**Figure S3.-** Experimental (black dots) and fitting decay (red line) of the excited **2** at 293K in aerated acetonitrile solution. Excitation at 370 nm. Emission at 532 nm.

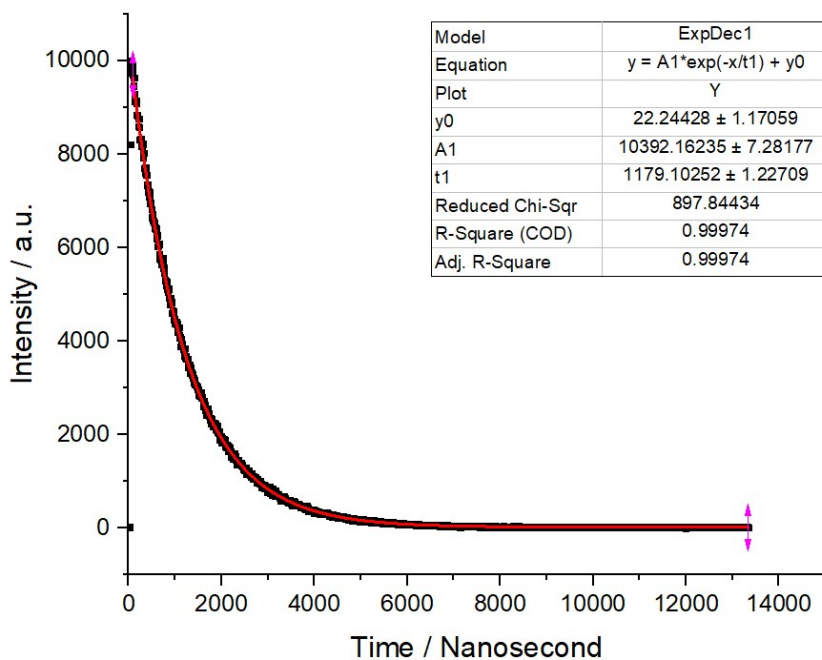



**Figure S4.-** Experimental (black dots) and fitting decay (red line) of the excited **1** at 293K in deaerated acetonitrile solution. Excitation at 375 nm. Emission at 532 nm.

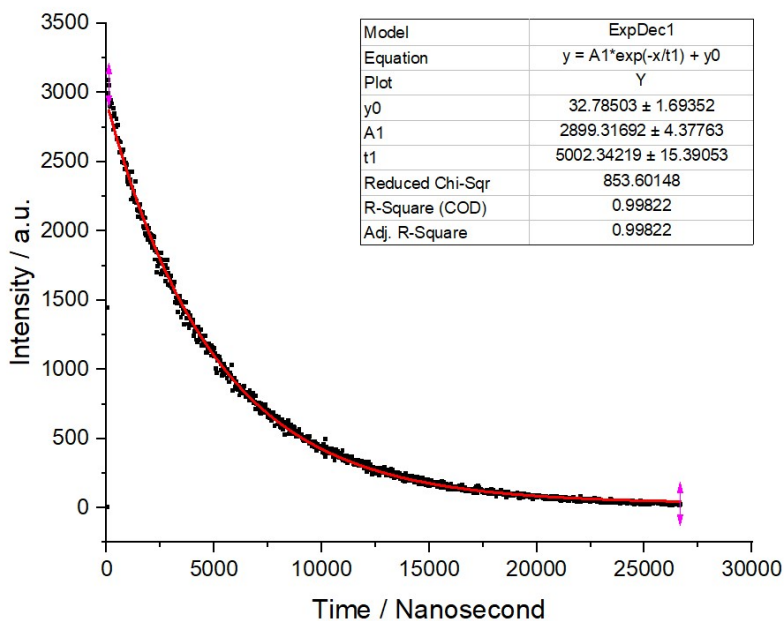

**Figure S5.-** Experimental (black dots) and fitting decay (red line) of the excited **2** at 293K in deaerated acetonitrile solution. Excitation at 370 nm. Emission at 532 nm.

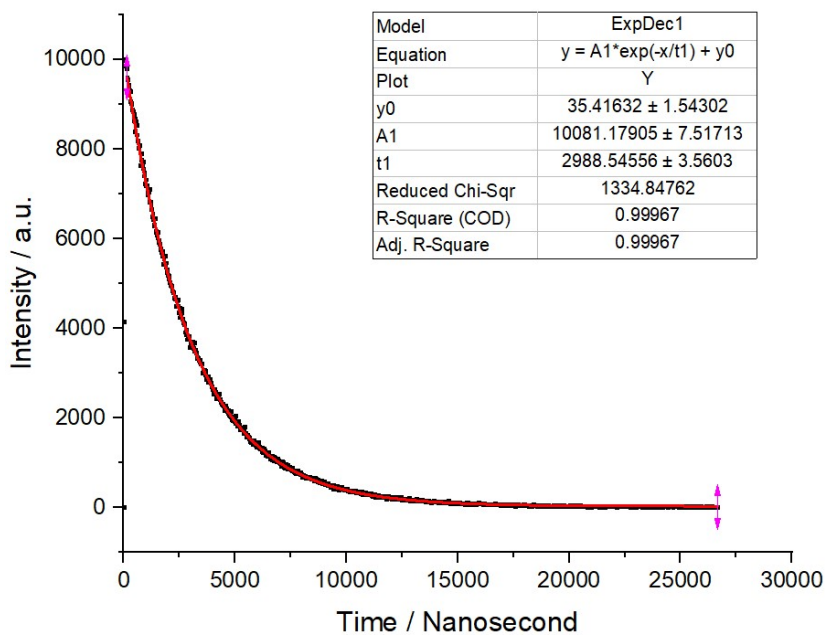

**Figure S6.-** Experimental (black dots) and fitting decay (red line) of the excited **1** at 77K in frozen acetonitrile solution. Excitation at 375 nm. Emission at 532 nm.

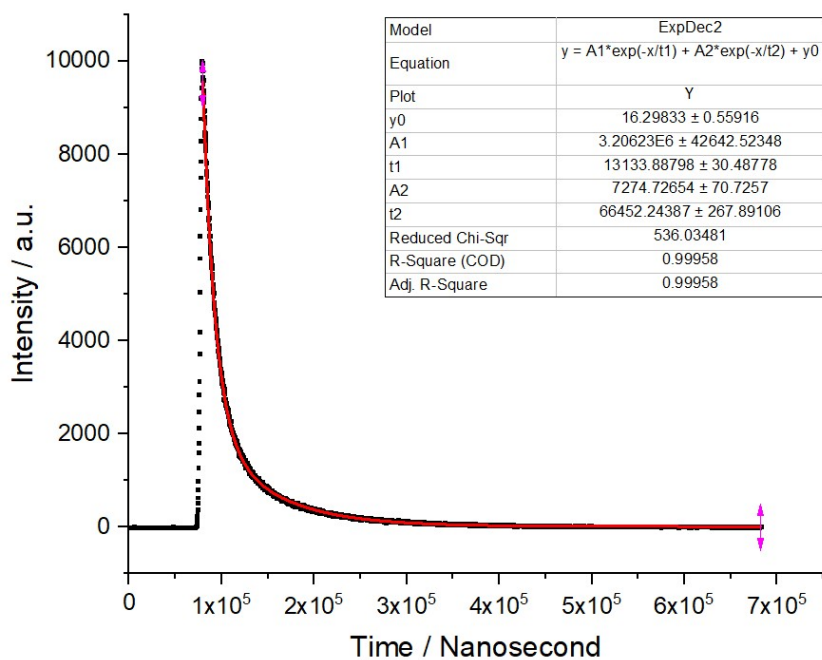

**Figure S7.-** Experimental (black dots) and fitting decay (red line) of the excited **2** at 77K in frozen acetonitrile solution. Excitation at 375 nm. Emission at 580 nm.

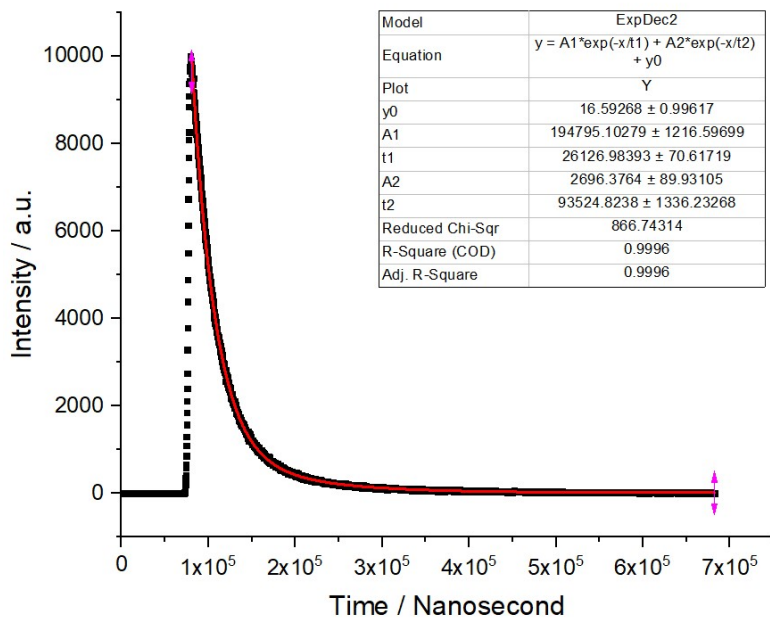

**Figure S8.-** Localization of the HOMO, LUMO, HOMO-1, HOMO-2, HOMO-3, LUMO+1, LUMO+2 and LUMO+3 orbitals for the ground state  $S_0$  of **1** and **2** Ir(III) complexes at the CAM-B3LYP/6-31G\*\* + LANL2DZ level of theory. The relative electron density distribution at the Ir atoms is placed between the parentheses. Hydrogen atoms are omitted for clarity.

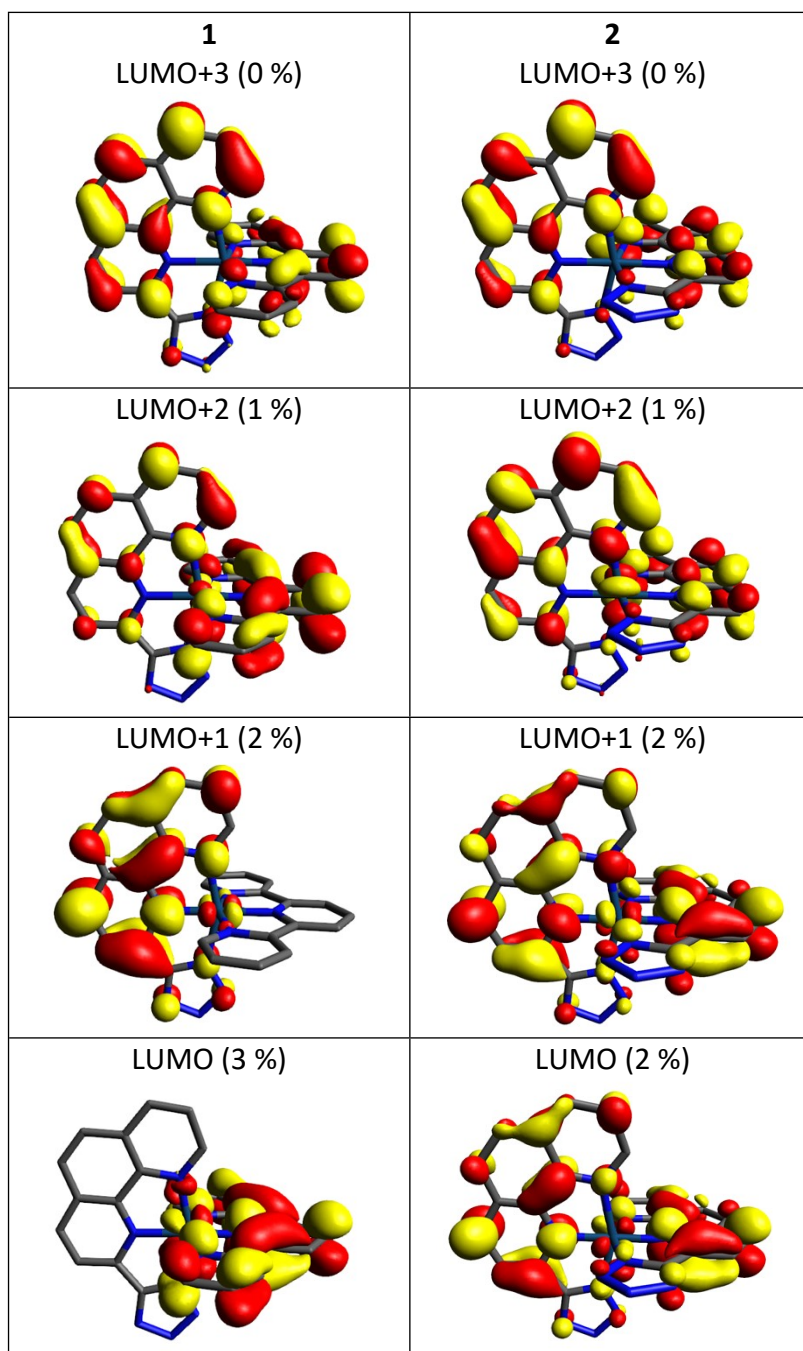

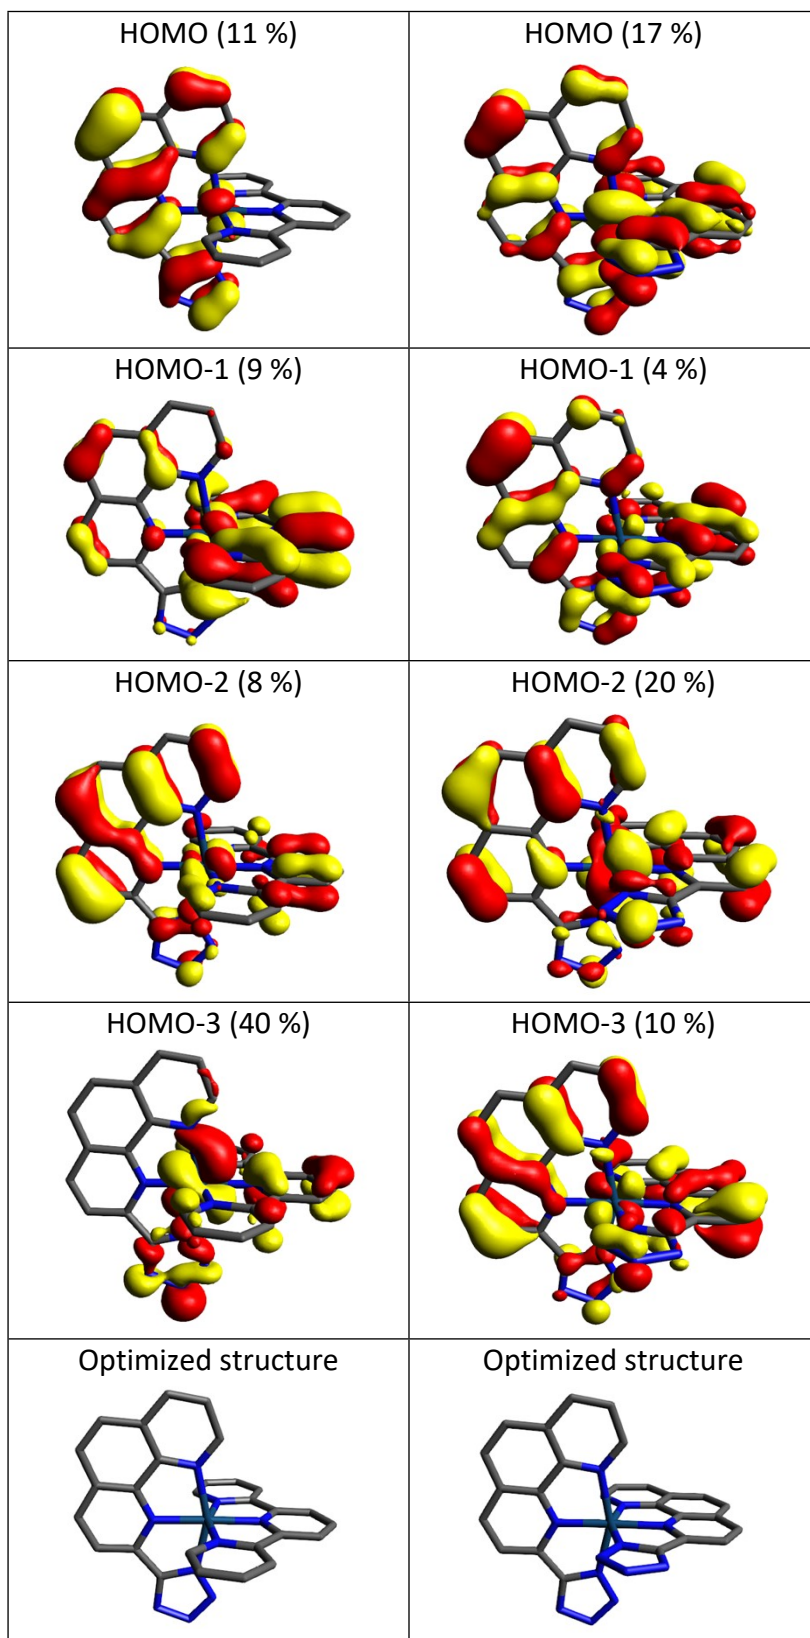

**Figure S9.-** Localization of the HOMO and LUMO orbitals for the excited state  $T_1$  of **1** and **2** Ir(III) complexes at the CAM-B3LYP/6-31G\*\* + LANL2DZ level of theory. The relative electron density distribution at the Ir atoms is placed between the parentheses. Hydrogen atoms are omitted for clarity.

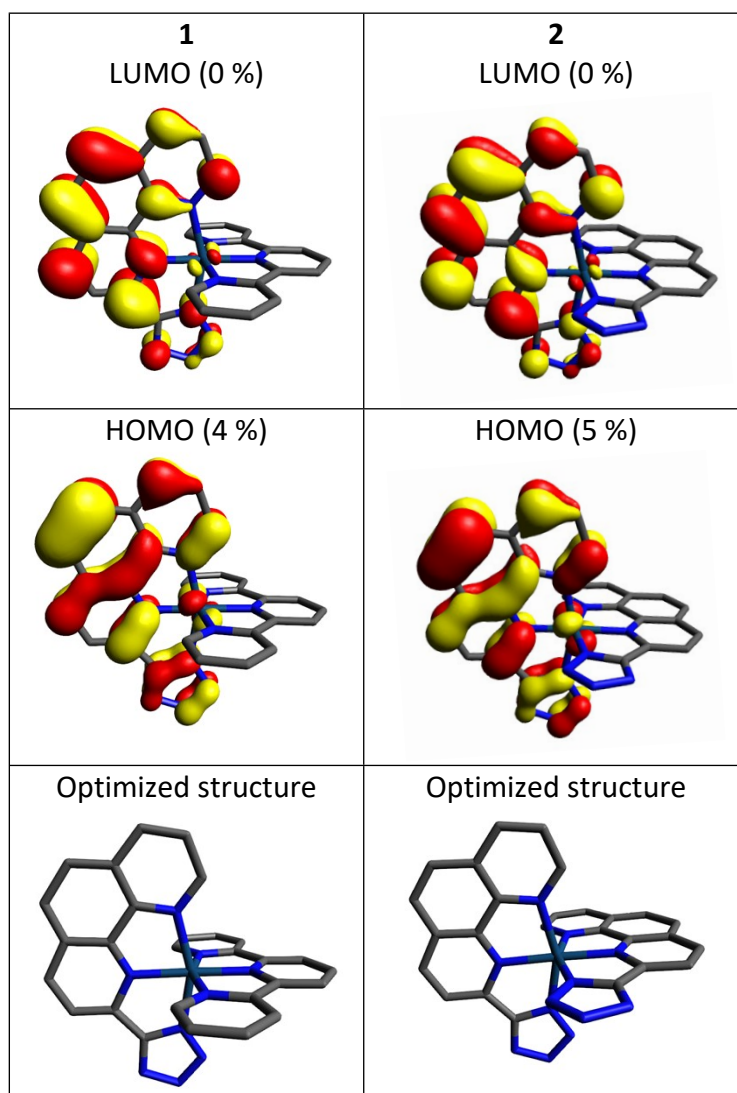

**Figure S8.-** Experimental (black dots) and fitting decay (red line) of the excited **1@SiO<sub>2</sub>** at 293K in aerated acetonitrile solution. Excitation at 375 nm. Emission at 535 nm.

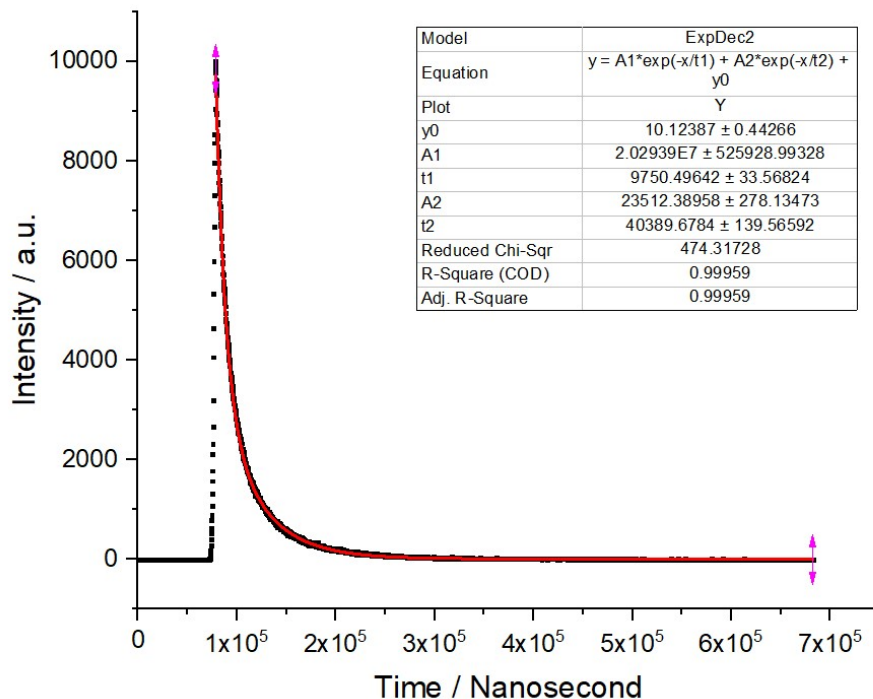

**Figure S9.-** Experimental (black dots) and fitting decay (red line) of the excited **1@SiO<sub>2</sub>** at 293K in deaerated acetonitrile solution. Excitation at 375 nm. Emission at 535 nm.

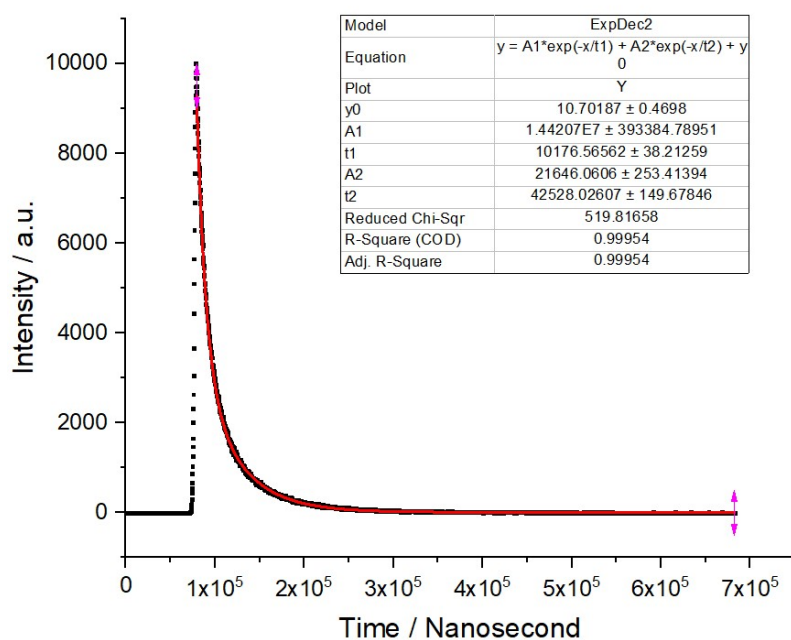



**Figure S10.-** Experimental (black dots) and fitting decay (red line) of the excited **1@SiO<sub>2</sub>** at 77K in frozen acetonitrile solution. Excitation at 375 nm. Emission at 532 nm.

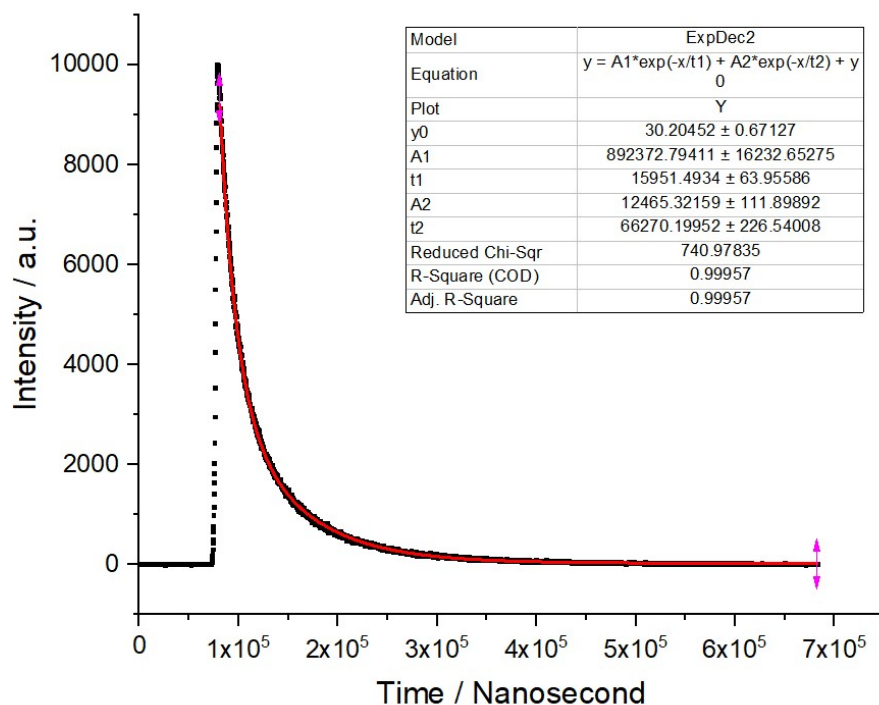

**Figure S11.-** TEM images of sample **1@SiO<sub>2</sub>**.

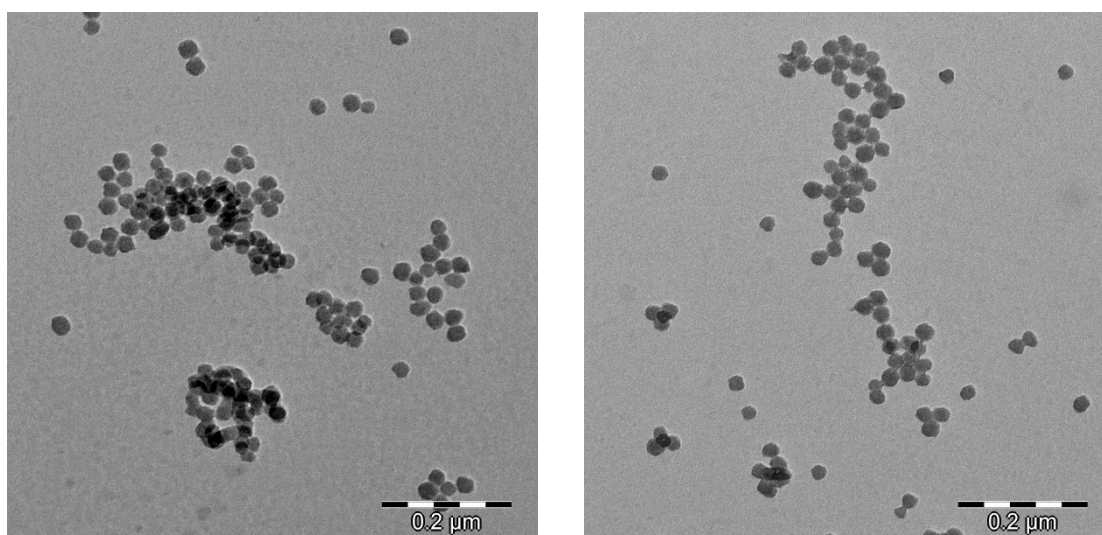

**Figure S12.-** Reduction range of the cyclic voltammograms for 1 mM solutions of complexes **1** (black) and **2** (red) in 0.1 M Bu<sub>4</sub>NPF<sub>6</sub> CH<sub>3</sub>CN.

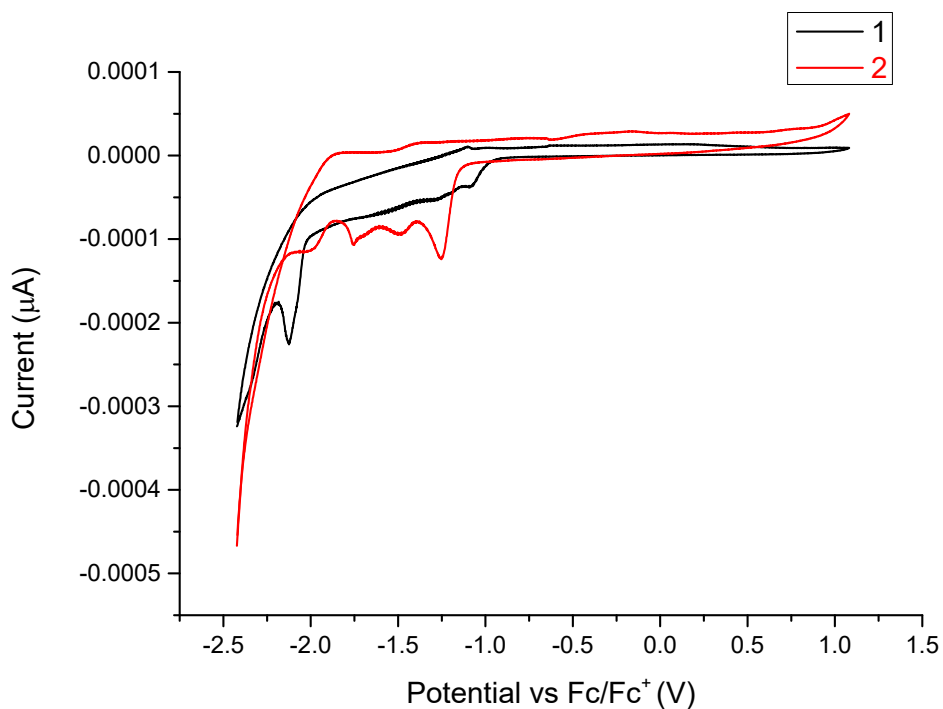

Cyclic voltammetry experiments show irreversible ligand-ligand centred reductions. The metal centred oxidation Ir<sup>III/IV</sup> is not observed, probably because it appears out of the explored potential range. Thus, the HOMO-LUMO energy gaps for both complexes cannot be determined experimentally and, therefore, compared with those calculated theoretically.
